# Supplementary material for: Asymmetric aerobic oxidative NHC-catalysed synthesis of dihydropyranones utilising a system of electron transfer mediators
Source: Royal Society of Chemistry journal article supplement (doi:10.1039/c6cc06060a), 2016-01-01
Supplement: c6cc06060a1.pdf [file c6cc06060a1.pdf]

## Supporting information

### Table of contents

---

|                                                                              |    |
|------------------------------------------------------------------------------|----|
| General information .....                                                    | 2  |
| Representative general procedure .....                                       | 2  |
| Optimisation of reaction .....                                               | 3  |
| Synthesis of methyl-( <i>R</i> )-4-acetyl-5-oxo-3-phenylhexanoate (24) ..... | 4  |
| NMR spectra of compounds .....                                               | 11 |
| HLPC data.....                                                               | 30 |
| References.....                                                              | 47 |

## General information

---

All solvents and reagents were purchased from commercial sources and used without further purification unless noted. Cinnamaldehyde was stored under nitrogen atmosphere. 4-fluorocinnamaldehyde was purified with column chromatography prior to use.  $^1\text{H}$  NMR (400 MHz),  $^{13}\text{C}$  NMR (101 MHz) and  $^{19}\text{F}$  NMR (376 MHz) spectra were recorded on Varian 400. The chemical shifts for the  $^1\text{H}$  NMR and  $^{13}\text{C}$  NMR spectra were reported in parts per million (ppm) relative to the peaks of  $\text{CDCl}_3$  for  $^1\text{H}$  NMR at  $\delta$  7.26 ppm and for  $^{13}\text{C}$  NMR at  $\delta$  77.16 ppm. Multiplicities were indicated by: s (singlet), d (doublet), t (triplet) and m (multiplet). All coupling constants ( $J$ ) were reported in Hertz (Hz). FT-ATR-IR spectra were recorded on a Perkin-Elmer Spectrum Frontier infrared spectrometer with pike-GladiATR<sup>TM</sup> module and are reported in wavenumber ( $\text{cm}^{-1}$ ) as follows: vs (very strong), s (strong), br (broad). High resolution mass spectra (HRMS) were performed on Sciex QSTARx1 mass spectrometer. Purification of the product was performed by an automated column chromatography Biotage Isolera<sup>TM</sup> Spectra One with Biotage SNAP®-10 g KP-sil columns. Thin layer chromatography (TLC) was performed on Merck TLC aluminium sheets precoated with silica gel 60 F<sub>254</sub> and visualised with UV-light (254 nm). Chiral HPLC was performed on Varian 9050 with Diacel Chiralpak with AD-H or OD-H column using eluent: *n*-hexane/2-propanol with a flow rate of 1.0 ml/min and detection wavelength at 254 nm, except for compound **24** where a detection wavelength of 211 nm were used. Optical rotations were measured on a Perkin Elmer Polarimeter 341 LC using  $\text{CH}_2\text{Cl}_2$  with a 10 cm cell (concentration (c) given in g/100 mL). Absolute configuration of the products was determined by comparing the optical rotation with known compounds. The racemic products used to determine the ee values were synthesised according to literature procedure.<sup>1</sup>

## Representative general procedure

---

To a 10 ml pear shaped round bottom flask equipped with a magnetic stir bar were added NHC catalyst **3** (4.6 mg, 0.012 mmol), oxidant **1** (10.2 mg, 0.025 mmol), lithium acetate dihydrate (12.8 mg, 0.12 mmol) and acetylacetone (38.5  $\mu\text{l}$ , 0.37 mmol) that was dissolved in toluene (2 mL). The solution was stirred for 5 minutes at ambient temperature before addition of cinnamaldehyde (15.8  $\mu\text{l}$ , 0.125 mmol) and iron(II)phthalocyanine (1.4 mg, 0.002 mmol). One additional portion of iron(II)phthalocyanine (1.4 mg, 0.002 mmol) was added to the reaction mixture every third hour, for the total time of 6 h ( $3 \times 0.002$  mmol). The reaction mixture was stirred at 40 °C open to the atmosphere. Completion of the reaction was monitored *via*  $^1\text{H}$  NMR. After completion the reaction mixture was purified with column chromatography using the biotage with ethyl acetate/petroleum ether (40–60 °C) solvent mixture (25 mL/min, 100% petroleum ether  $\rightarrow$  4%  $\rightarrow$  6%  $\rightarrow$  13%  $\rightarrow$  50% ethyl acetate in petroleum ether). The product was obtained as a white solid. The enantiomeric excess was determined by HPLC analysis using a chiral AD-H column with *n*-hexane/2-propanol (99:1).



## Optimisation of reaction

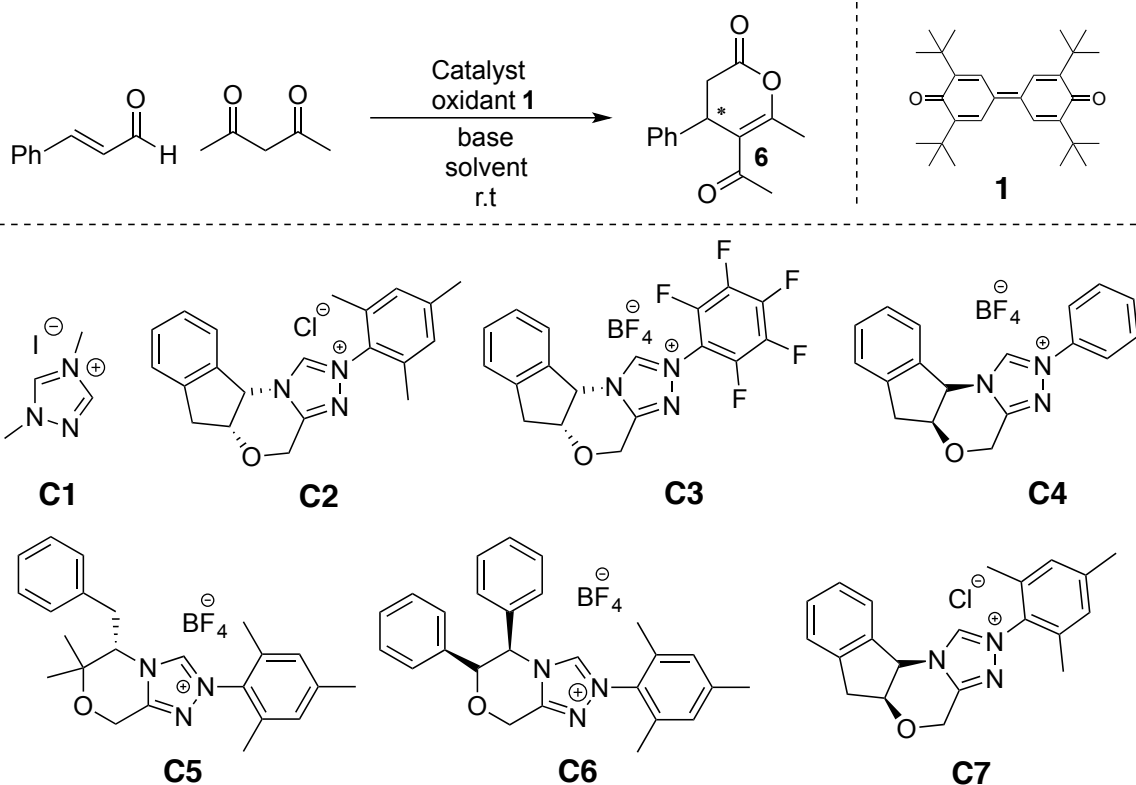

| Table S1. Catalyst screen |     |      |         |      |       |       |
|---------------------------|-----|------|---------|------|-------|-------|
| Entry <sup>a</sup>        | Cat | Base | Solvent | Time | Yield | ee    |
| 1                         | C1  | DBU  | THF     | 3h   | 71%   | 0     |
| 2                         | C2  | DBU  | THF     | 28h  | 62%   | -44.9 |
| 3                         | C3  | DBU  | THF     | 72h  | -     | -     |
| 4                         | C4  | DBU  | THF     | 3h   | 59%   | 18    |
| 5                         | C5  | DBU  | THF     | 3h   | 36%   | -43   |
| 6                         |     | DBU  | THF     | 22h  | -     | -     |
| 7                         | C6  | DBU  | THF     | 18h  | 55%   | -47   |

| Table S2. Solvent screen |     |      |         |      |       |     |
|--------------------------|-----|------|---------|------|-------|-----|
| Entry <sup>a</sup>       | Cat | Base | Solvent | Time | Yield | ee  |
| 8                        | C2  | DBU  | Toluene | 16h  | 56%   | -62 |
| 9                        | C2  | DBU  | DCM     | 16h  | 62%   | -24 |
| 10                       | C6  | DBU  | Toluene | 16h  | 46%   | -34 |
| 11                       | C6  | DBU  | DCM     | 16h  | 52%   | -22 |
| 12                       | C2  | DBU  | MeCN    | 3h   | 54%   | 19  |
| 13                       | C2  | DBU  | Heptane | 24h  | -     | -   |
| 14                       | C2  | DBU  | EtOAc   | 3h   | 55%   | -27 |
| 15                       | C2  | DBU  | MeTHF   | 16h  | 58%   | -52 |
| 16                       | C2  | DBU  | Anisole | 16h  | 52%   | -57 |

| Table S3. Base screen |     |                                 |         |      |       |     |
|-----------------------|-----|---------------------------------|---------|------|-------|-----|
| Entry <sup>a</sup>    | Cat | Base                            | Solvent | Time | Yield | ee  |
| 16                    | C2  | DBU                             | Anisole | 16h  | 52%   | -57 |
| 17                    | C7  | DABCO                           | Toluene | 17h  | 60%   | 82  |
| 18                    | C7  | Et <sub>3</sub> N               | Toluene | 17h  | 60%   | 86  |
| 19                    | C7  | K <sub>2</sub> CO <sub>3</sub>  | Toluene | 17h  | 42%   | 87  |
| 20                    | C7  | DIPEA                           | Toluene | 18h  | 34%   | 79  |
| 21                    | C7  | Cs <sub>2</sub> CO <sub>3</sub> | Toluene | 18h  | 57%   | 83  |
| 22                    | C7  | Lithium acetate dihydrate       | Toluene | 20h  | 60%   | 94  |

<sup>a</sup>To a 4 ml vial equipped with a magnetic stir bar were added NHC catalyst (0.1 eq.), solvent (3 mL) and base (0.5 eq.). The solution was stirred for 5 minutes at ambient temperature before addition of oxidant (1 eq.) and acetylacetone compound (1.5 eq.). After stirring for additional 5 minutes cinnamaldehyde (0.25 mmol) was added and the reaction was stirred at ambient temperature. The reaction was monitored *via* <sup>1</sup>H NMR and when the reaction was completed the mixture was purified with a biotage isolera system using ethyl acetate/petroleum ether (40– 60°C) solvent mixture (10 mL/min, 100% petroleum ether →4%→6%→13%→50% ethyl acetate in petroleum ether). The product was obtained as a white solid. The enantiomeric excess was determined by HPLC analysis on a chiral AD-H column (with *n*-hexane/2-propanol (99:1) as eluent).

### Synthesis of methyl-(*R*)-4-acetyl-5-oxo-3-phenylhexanoate (24)

To a vial equipped with a magnetic stir bar was added (S)-5-acetyl-6-methyl-4-phenyl-3,4-dihydro-2*H*-pyran-2-one (18.2 mg, 0.08 mmol). To this were added a solution of 1,4-dimethyl-4*H*-1,2,4-triazole iodide (1.9 mg, 0.008 mmol) and 1,8-diazabicyclo[5.4.0.]undec-7-ene (1.3 mg, 0.009 mmol) in methanol (1 mL). The mixture was stirred at ambient temperature overnight. The volatiles were removed under reduced pressure yielding a yellow oil. The crude mixture was purified by column chromatography using a pipette column using petroleum ether (40–60 °C)/acetone (4:1) as eluent. The product was obtained as a white solid (19.7 mg, 0.08 mmol, 95% yield).

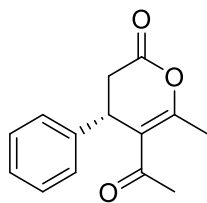

**5-Acetyl-6-methyl-4-phenyl-3,4-dihydro-2H-pyran-2-one (6)<sup>1</sup>:**

Synthesised from cinnamaldehyde and acetylacetone according to the general procedure. Obtained as a white solid (18.2 mg, 0.079 mmol, 77% yield). The ee (94%) was measured by HPLC using chiral stationary phase [AD-H column, *n*-hexane/2-propanol (99:1), 1.0 mL/min),  $t_R$  = 32.704 min (major), 47.869 min (minor)].  $[\alpha]_D^{20}$  = +90.6 ( $c$  = 1,  $\text{CH}_2\text{Cl}_2$ ).  $^1\text{H}$  NMR (400 MHz,  $\text{CDCl}_3$ )  $\delta$  7.36–7.31 (m, 2 H), 7.30–7.27 (m, 1 H), 7.16–7.13 (m, 2 H), 2.94 (dd,  $J$  = 15.6 Hz, 7.3 Hz, 1 H), 2.81 (dd,  $J$  = 15.8 Hz, 3.0 Hz, 1 H), 2.43 (d,  $J$  = 0.9 Hz, 3 H), 2.12 (s, 3 H).  $^{13}\text{C}$  NMR (101 MHz,  $\text{CDCl}_3$ )  $\delta$  197.7, 165.4, 160.0, 139.5, 129.2, 127.7, 126.4, 117.1, 38.6, 37.0, 29.6, 18.9.

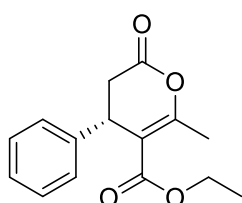

**Ethyl 6-methyl-2-oxo-4-phenyl-3,4-dihydro-2H-pyran-5-carboxylate (15)<sup>1</sup>:**

Synthesised from cinnamaldehyde and ethyl acetoacetate according to the general procedure and obtained as a white solid (28.1 mg, 0.108 mmol, 86% yield). The ee (90%) was measured by HPLC using chiral stationary phase [OD-H column, *n*-hexane/2-propanol (90:10), 1.0 ml/min),  $t_R$  = 7.366 min (major), 13.211 min (minor)].  $[\alpha]_D^{20}$  = +120.2 ( $c$  = 0.5,  $\text{CH}_2\text{Cl}_2$ ).  $^1\text{H}$  NMR (400 MHz,  $\text{CDCl}_3$ )  $\delta$  7.33–7.27 (m, 2 H), 7.25–7.23 (m, 1 H), 7.16–7.12 (m, 2 H), 4.28–4.23 (m, 1 H), 4.13 (q,  $J$  = 6.9 Hz, 2 H), 2.95 (dd,  $J$  = 15.9 Hz, 7.6 Hz, 1 H), 2.83 (dd,  $J$  = 15.9 Hz, 2.4 Hz, 1 H), 2.5 (d,  $J$  = 1.0 Hz, 3 H), 1.19 (t,  $J$  = 7.1 Hz, 3 H).  $^{13}\text{C}$  NMR (101 MHz,  $\text{CDCl}_3$ )  $\delta$  166.3, 166.1, 161.5, 140.8, 129.2, 127.6, 126.7, 110.2, 61.0, 38.0, 36.5, 19.0, 14.2.

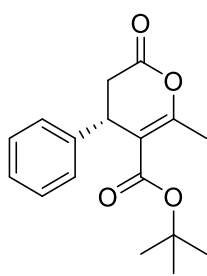

**Tert-butyl 6-methyl-2-oxo-4-phenyl-3,4-dihydro-2H-pyran-5-carboxylate (21)<sup>2</sup>:**

Synthesised from cinnamaldehyde and *t*-butyl acetoacetate according to the general procedure and obtained as a yellow oil (26.2 mg, 0.091 mmol, 73% yield). The ee (92%) was measured by HPLC using chiral stationary phase [OD-H, *n*-hexane/2-propanol (85:5), 1.0 ml/min),  $t_R$  = 5.117 min (major), 8.129 min (minor)].  $[\alpha]_D^{20}$  = +78.2 ( $c$  = 0.5,  $\text{CH}_2\text{Cl}_2$ ).  $^1\text{H}$  NMR (400 MHz,  $\text{CDCl}_3$ )  $\delta$  7.32–7.27 (m, 2 H), 7.25–7.22 (m, 1 H), 7.15–7.11 (m, 2 H), 7.19–7.15 (m, 1 H), 2.91 (dd,  $J$  = 15.7 Hz, 7.6 Hz, 1 H), 2.78 (dd,  $J$  = 15.9 Hz, 2.9 Hz, 1 H), 2.43 (d,  $J$  = 1.1 Hz, 3 H), 1.35 (9 H, s).  $^{13}\text{C}$  NMR (101 MHz,  $\text{CDCl}_3$ )  $\delta$  166.5, 165.3, 160.3, 141.1, 129.1, 127.5, 126.7, 111.5, 81.6, 38.4, 36.6, 28.2, 18.8.

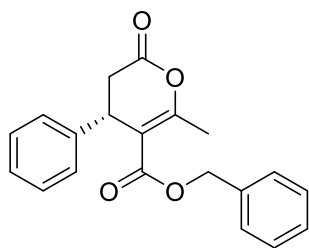

**Benzyl 6-methyl-2-oxo-4-phenyl-3,4-dihydro-2H-pyran-5-carboxylate (22)**<sup>3</sup>: Synthesised from cinnamaldehyde and benzyl acetylacetone according to the general procedure and obtained as a yellow oil (29.8 mg, 0.092 mmol, 74% yield). The ee (86%) was measured by HPLC using chiral stationary phase [OD-H, *n*-hexane/2-propanol (95:5), 1.0 ml/min),  $t_R$  = 15.089 min (major),

23.927 min (minor)].  $[\alpha]_D^{20}$  = +12.1 ( $c$  = 1,  $\text{CH}_2\text{Cl}_2$ ).  $^1\text{H}$  NMR (400 MHz,  $\text{CDCl}_3$ )  $\delta$  7.38–7.26 (m, 6 H), 7.17–7.09 (m, 4 H), 5.19–5.06 (m, 2 H), 4.28 (d,  $J$  = 7.4 Hz, 1 H), 2.95 (dd,  $J$  = 15.9 Hz, 1 H), 2.82 (dd,  $J$  = 15.8, 2.2 Hz, 1 H), 2.49 (d,  $J$  = 1.0 Hz, 3 H)  $\delta$   $^{13}\text{C}$  NMR (101 MHz,  $\text{CDCl}_3$ )  $\delta$  166.1, 165.9, 162.2, 140.7, 135.7, 129.2, 128.6, 128.3, 128.0, 127.7, 126.8, 109.8, 66.7, 38.1, 36.5, 19.1.

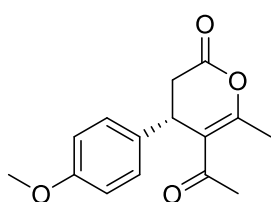

**5-acetyl-4-(4-methoxyphenyl)-6-methyl-3,4-dihydro-2H-pyran-2-one (10)**<sup>1</sup>: Synthesised from 4-methoxycinnamaldehyde and acetylacetone according to the general procedure, however, with 0.65 eq of lithium acetate dihydrate instead. Obtained as a yellow oil (25.4 mg, 0.098 mmol, 76% yield). The ee (85%) was measured by HPLC

using chiral stationary phase [OD-H, *n*-hexane/2-propanol (90:10), 1.0 ml/min),  $t_R$  = 20.081 min (major), 23.806 min (minor)].  $[\alpha]_D^{20}$  = +27 ( $c$  = 0.5,  $\text{CH}_2\text{Cl}_2$ ).  $^1\text{H}$  NMR (400 MHz,  $\text{CDCl}_3$ )  $\delta$  7.08–7.03 (m, 2 H), 6.88–6.82 (m, 2 H), 4.11–4.07 (m, 1 H), 3.78 (s, 3 H), 2.94 (dd,  $J$  = 15.6 Hz, 7.2 Hz, 1 H), 2.78 (dd,  $J$  = 15.6 Hz, 2.7 Hz, 1 H), 2.42 (d,  $J$  = 1.0 Hz, 3 H), 2.12 (s, 3 H).  $^{13}\text{C}$  NMR (101 MHz,  $\text{CDCl}_3$ )  $\delta$  197.9, 165.6, 159.8, 159.0, 131.4, 127.6, 117.4, 114.6, 55.1, 38.0, 37.3, 29.5, 18.9.

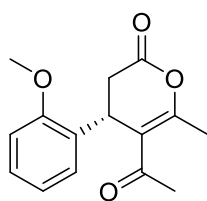

**5-acetyl-4-(2-methoxyphenyl)-6-methyl-3,4-dihydro-2H-pyran-2-one (11)**<sup>3</sup>:

Synthesised from 2-methoxycinnamaldehyde and acetylacetone according to the general procedure, however, with exclusion of light using aluminium foil and obtained as a yellow solid (29.7 mg, 0.114 mmol, 91% yield). The ee (81%) was measured by HPLC using chiral stationary phase [AD-H, *n*-hexane/2-propanol (99:1), 1.0 ml/min),  $t_R$  = 26.556 min (major), 24.388 min (minor)].  $[\alpha]_D^{20}$  = +46.5 ( $c$  = 1,  $\text{CH}_2\text{Cl}_2$ ).  $^1\text{H}$  NMR (400 MHz,  $\text{CDCl}_3$ )  $\delta$  7.29–7.23 (m, 1 H), 7.00–6.95 (m, 1 H), 6.94–6.86 (m, 2 H), 4.53–4.46 (m, 1 H), 3.86 (s, 3 H), 2.92–2.82 (m, 2 H), 2.42 (s, 3 H), 2.08 (s, 3 H).  $^{13}\text{C}$  NMR (101 MHz,  $\text{CDCl}_3$ )  $\delta$  198.6, 166.4, 160.6, 129.3, 127.3, 127.1, 121.1, 116.4, 110.9, 55.3, 35.0, 32.9, 29.4, 19.1.

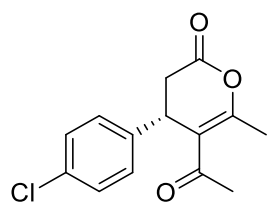

**5-acetyl-4-(4-chlorophenyl)-6-methyl-3,4-dihydro-2H-pyran-2-one**

**(9)<sup>2</sup>**: Synthesised from 4-chlorocinnamaldehyde and acetylacetone according to the general procedure, however, with 0.65 eq of lithium acetate dihydrate and obtained as a white solid (26.5 mg, 0.100 mmol, 80% yield). The ee (91%) was measured by HPLC using chiral

stationary phase [AD-H, *n*-hexane/2-propanol (90:10), 1.0 ml/min),  $t_R$  = 10.712 min (major), 9.989 min (minor)].  $[\alpha]_D^{20}$  = + 17.2 ( $c$  = 1,  $\text{CH}_2\text{Cl}_2$ ).  $^1\text{H}$  NMR (400 MHz,  $\text{CDCl}_3$ )  $\delta$  7.34–7.29 (m, 2 H), 7.11–7.07 (m, 2 H), 4.16–4.13 (m, 1 H), 2.96 (dd,  $J$  = 15.7 Hz, 7.2 Hz, 1 H), 2.81 (dd,  $J$  = 15.7 Hz, 2.5 Hz, 1 H), 2.43 (d,  $J$  = 0.9 Hz, 3 H), 2.14 (3 H, s).  $^{13}\text{C}$  NMR (101 MHz,  $\text{CDCl}_3$ )  $\delta$  197.2, 165.1, 160.4, 138.1, 133.7, 129.5, 127.9, 117.0, 38.2, 36.8, 29.7, 19.1.

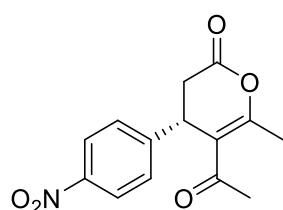

**5-acetyl-6-methyl-4-(4-nitrophenyl)-3,4-dihydro-2H-pyran-2-one**

**(12)<sup>2</sup>**: Synthesized from 4-nitrocinnamaldehyde and acetylacetone according to the general procedure and obtained as a yellow solid (22.4 mg, 0.081 mmol, 65% yield). The ee (90%) was measured by HPLC using chiral stationary phase [OD-H, *n*-hexane/2-propanol (80:20), 1.0 ml/min),  $t_R$  = 25.407 min (major), 36.507 min (minor)].

$[\alpha]_D^{20}$  = + 19.3 ( $c$  = 1,  $\text{CH}_2\text{Cl}_2$ ).  $^1\text{H}$  NMR (400 MHz,  $\text{CDCl}_3$ )  $\delta$  8.24–8.17 (m, 2 H), 7.37–7.31 (m, 2 H), 4.36–4.30 (m, 1 H), 3.02 (dd,  $J$  = 15.9 Hz, 7.4 Hz, 1 H), 2.85 (dd,  $J$  = 15.9 Hz, 2.4 Hz, 1 H), 2.48 (d,  $J$  = 1 Hz, 3 H), 2.21 (s, 3 H).  $^{13}\text{C}$  NMR (101 MHz,  $\text{CDCl}_3$ )  $\delta$  196.7, 164.9, 161.4, 147.4, 127.9, 124.8, 117.3, 38.5, 36.5, 30.4, 19.7.

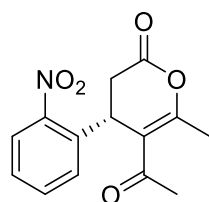

**5-acetyl-6-methyl-4-(2-nitrophenyl)-3,4-dihydro-2H-pyran-2-one (13)<sup>1</sup>**:

Synthesised from 2-nitrocinnamaldehyde and acetylacetone according to the general procedure and obtained as a yellow solid (25.1 mg, 0.091 mmol, 73% yield). The ee (90%) was measured by HPLC using chiral stationary phase [AD-H, *n*-hexane/2-propanol (90:10), 1.0 ml/min),  $t_R$  = 15.887 min

(major), 14.644 min (minor)].  $[\alpha]_D^{20}$  = +316.8 ( $c$  = 1,  $\text{CH}_2\text{Cl}_2$ ).  $^1\text{H}$  NMR (400 MHz,  $\text{CDCl}_3$ )  $\delta$  7.99 (m, 1 H), 7.59 (m, 1 H), 7.48 (m, 1 H), 7.22 (m, 1 H), 4.88–4.84 (m, 1 H), 3.08 (dd,  $J$  = 16.1 Hz, 7.5 Hz, 1 H), 3.01 (dd,  $J$  = 16.1 Hz, 2.6 Hz, 1 H), 2.48 (d,  $J$  = 1.09, 3 H), 2.09 (s, 3 H).  $^{13}\text{C}$  NMR (101 MHz,  $\text{CDCl}_3$ )  $\delta$  196.8, 165.1, 162.1, 148.8, 134.2, 129.3, 128.3, 125.9, 116.6, 35.9, 34.3, 29.9, 19.5.

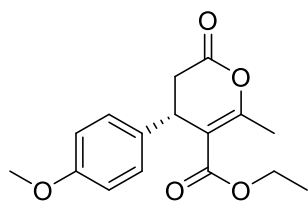

**Ethyl 4-(4-methoxyphenyl)-6-methyl-2-oxo-3,4-dihydro-2H-pyran-5-carboxylate (16)<sup>4</sup>:** Synthesised from 4-methoxycinnamaldehyde and ethyl acetoacetate according to the general procedure and obtained as a yellow oil (28.7 mg, 0.01 mmol, 79% yield). The ee (85%) was measured by HPLC using chiral stationary phase [OD-H, *n*-hexane/2-propanol (90:10), 1.0 ml/min),  $t_R$  = 9.677 min (major), 14.589 min (minor)].  $[\alpha]_D^{20}$  = +73.9 ( $c$  = 1,  $\text{CH}_2\text{Cl}_2$ ).  $^1\text{H}$  NMR (400 MHz,  $\text{CDCl}_3$ )  $\delta$  7.08–7.03 (m, 2 H), 6.85–6.79 (m, 2 H), 4.23–4.18 (m, 1 H), 4.14 (q,  $J$  = 7.1 Hz, 2 H), 3.77 (s, 3 H), 2.92 (dd,  $J$  = 15.8 Hz, 7.5 Hz, 1 H), 2.79 (dd,  $J$  = 15.8 Hz, 2.0 Hz, 1 H), 2.46 (s, 3 H), 1.20 (t,  $J$  = 7.1 Hz, 3 H).  $^{13}\text{C}$  NMR (101 MHz,  $\text{CDCl}_3$ )  $\delta$  166.5, 166.2, 161.2, 159.0, 132.8, 127.8, 114.5, 110.5, 61.0, 55.4, 37.2, 36.7, 19.0, 14.2.

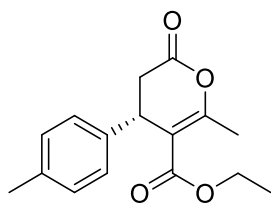

**Ethyl 6-methyl-2-oxo-4-(*p*-tolyl)-3,4-dihydro-2H-pyran-5-carboxylate (17)<sup>4</sup>:** Synthesised from 4-methylcinnamaldehyde and ethyl acetoacetate according to the general procedure and obtained as a yellow oil (18.6 mg, 0.068 mmol, 54% yield). The ee (87%) was measured by HPLC using chiral stationary phase [OD-H, *n*-hexane/2-propanol (90:10), 1.0 ml/min),  $t_R$  = 6.608 min (major), 10.189 min (minor)].  $[\alpha]_D^{20}$  = +113.7 ( $c$  = 1,  $\text{CH}_2\text{Cl}_2$ ).  $^1\text{H}$  NMR (400 MHz,  $\text{CDCl}_3$ )  $\delta$  7.12–7.07 (m, 2 H), 7.04–6.99 (m, 2 H), 4.24–4.19 (m, 1 H), 4.13 (qd,  $J$  = 7.1 Hz, 2.8 Hz, 2 H), 2.92 (dd,  $J$  = 15.8 Hz, 7.5 Hz, 1 H), 2.80 (dd,  $J$  = 15.8 Hz, 2.3 Hz, 1 H), 2.46 (s, 3 H), 2.30 (s, 3 H), 1.20 (t,  $J$  = 7.1 Hz, 3 H).  $^{13}\text{C}$  NMR (101 MHz,  $\text{CDCl}_3$ )  $\delta$  166.4, 166.2, 161.3, 137.7, 137.3, 129.8, 126.6, 110.4, 61.0, 37.6, 36.6, 21.2, 19.0, 14.2.

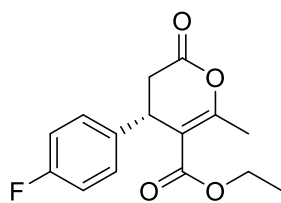

**Ethyl 4-(4-fluorophenyl)-6-methyl-2-oxo-3,4-dihydro-2H-pyran-5-carboxylate (18)<sup>4</sup>:** Synthesised from 4-fluorocinnamaldehyde and ethyl acetoacetate according to the general procedure and obtained as a yellow solid (20.4 mg, 0.073 mmol, 63% yield). The ee (90%) was measured by HPLC using chiral stationary phase [OD-H, *n*-hexane/2-propanol (95:5), 1.0 ml/min),  $t_R$  = 9.587 min (major), 20.219 min (minor)].  $[\alpha]_D^{20}$  = +139.3 ( $c$  = 1,  $\text{CH}_2\text{Cl}_2$ ).  $^1\text{H}$  NMR (400 MHz,  $\text{CDCl}_3$ )  $\delta$  7.14–7.07 (m, 2 H), 7.03–6.94 (m, 2 H), 4.27–4.22 (m, 1 H), 4.14 (q,  $J$  = 7.1 Hz, 2 H), 2.94 (dd,  $J$  = 15.8 Hz, 7.6 Hz, 1 H), 2.80 (dd,  $J$  = 15.8 Hz, 2.2 Hz, 1 H), 2.47 (d,  $J$  = 1.0 Hz, 3 H), 1.20 (t,  $J$  = 7.1 Hz, 3 H).  $^{13}\text{C}$  NMR (101 MHz,  $\text{CDCl}_3$ )  $\delta$  166.0, 166.0, 162.2 (d,  $^1J_{\text{C-F}}$  = 246 Hz), 161.6, 136.5 (d,  $^4J_{\text{C-F}}$  = 3.4 Hz), 128.4 (d,  $^3J_{\text{C-F}}$  = 8.1 Hz), 116.1 (d,  $^2J_{\text{C-F}}$  = 21.5 Hz), 110.1, 61.1, 37.3, 36.6, 19.1, 14.2.  $^{19}\text{F}$  NMR (376 MHz,  $\text{CDCl}_3$ )  $\delta$  -115.1.

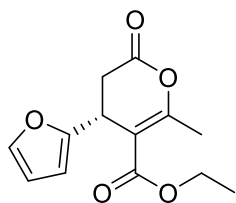

**Ethyl 4-(furan-2-yl)-6-methyl-2-oxo-3,4-dihydro-2H-pyran-5-carboxylate (19):**

Synthesised from 3-(2-furyl)acrolein and ethyl acetoacetate according to the general procedure and obtained as a yellow oil (19.5 mg, 0.078 mmol, 61% yield). The ee (90%) was measured by HPLC using chiral stationary phase [OD-H, *n*-hexane/2-propanol (90:10), 1.0 ml/min),  $t_R$  = 7.622 min (major), 12.549 min (minor)].  $[\alpha]_D^{20}$  = +59 ( $c$  = 1,  $\text{CH}_2\text{Cl}_2$ ).  $^1\text{H}$  NMR (400 MHz,  $\text{CDCl}_3$ )  $\delta$  7.33–7.27 (m, 1 H), 6.29–6.25 (m, 1 H), 6.16–5.76 (m, 1 H), 4.43–4.30 (m, 1 H), 4.31–3.97 (m, 2 H), 3.00 (dd,  $J$  = 16.0 Hz, 1.9 Hz, 1 H), 2.83 (dd,  $J$  = 16.0 Hz, 7.2 Hz, 1 H), 2.41 (s, 3 H), 1.29 (t,  $J$  = 7.1 Hz, 3 H).  $^{13}\text{C}$  NMR (101 MHz,  $\text{CDCl}_3$ )  $\delta$  166.1, 165.8, 162.1, 142.5, 110.4, 108.2, 106.2, 61.1, 33.4, 31.7, 19.1, 14.3. HRMS (ESI) calcd for  $\text{C}_{13}\text{H}_{14}\text{O}_5$   $[\text{M}+\text{H}]^+$ : Exact Mass: 251.0919, Found: 251.0928. FTIR-ATR ( $\text{cm}^{-1}$ ): 2983.1 (br), 1787.4 (s), 1707.2 (s), 1648.7 (s), 1282 (s), 1241 (s), 1115.6 (vs), 1072.4 (vs).

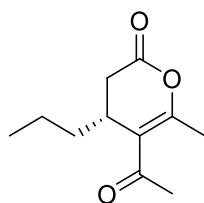

**5-acetyl-6-methyl-4-propyl-3,4-dihydro-2H-pyran-2-one (14):**

Synthesised from *trans*-2-hexen-1-al and acetylacetone according to the general procedure and obtained as a yellow oil (18.7 mg, 0.095 mmol, 65% yield). The ee (83%) was measured by HPLC using chiral stationary phase [OD-H, *n*-hexane/2-propanol (90:10), 1.0 ml/min),  $t_R$  = 8.409 min (major), 9.304 min (minor)].  $[\alpha]_D^{20}$  = +16.2 ( $c$  = 0.5,  $\text{CH}_2\text{Cl}_2$ ).  $^1\text{H}$  NMR (400 MHz,  $\text{CDCl}_3$ )  $\delta$  2.97–2.83 (m, 1 H), 2.72 (dd,  $J$  = 15.9 Hz, 2.0 Hz, 1 H), 2.58 (dd,  $J$  = 15.9 Hz, 6.4 Hz, 1 H), 2.34 (s, 3 H), 2.27 (s, 3H). 1.49–1.19 (m, 4 H), 0.90 (t,  $J$  = 7.0 Hz, 3 H).  $^{13}\text{C}$  NMR (101 MHz,  $\text{CDCl}_3$ )  $\delta$  197.9, 167.2, 159.0, 120.5, 35.7, 33.2, 32.2, 30.4, 20.0, 19.5, 14.0.

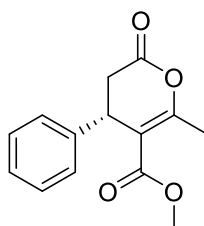

**Methyl 6-methyl-2-oxo-4-phenyl-3,4-dihydro-2H-pyran-5-carboxylate (20):**

Synthesised from cinnamaldehyde and methyl acetoacetate according to the general procedure and obtained as a off-white solid (24.3 mg, 0.099 mmol, 79% yield). The ee (95%) was measured by HPLC using chiral stationary phase [AD-H column, *n*-hexane/2-propanol (99:1), 1.0 ml/min),  $t_R$  = 12.251 min (major), 11.816 min (minor)].  $[\alpha]_D^{20}$  = +157.8 ( $c$  = 1,  $\text{CH}_2\text{Cl}_2$ ).  $^1\text{H}$  NMR (400 MHz,  $\text{CDCl}_3$ )  $\delta$  7.33–7.22 (m, 3 H), 7.15–7.11 (m, 2 H), 4.28–4.24 (m, 1 H), 3.68 (s, 3 H), 2.94 (dd,  $J$  = 15.8 Hz, 7.5 Hz, 1 H), 2.83 (dd,  $J$  = 15.8 Hz, 2.2 Hz, 1 H), 2.48 (d,  $J$  = 0.9 Hz, 3 H).  $^{13}\text{C}$  NMR (101 MHz,  $\text{CDCl}_3$ )  $\delta$  166.6, 166.1, 161.9, 140.5, 129.2, 127.7, 126.7, 109.8, 52.1, 37.9, 36.6, 19.1.

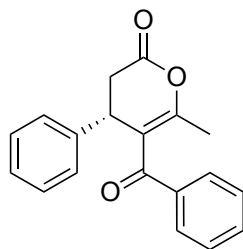

**5-benzoyl-6-methyl-4-phenyl-3,4-dihydro-2H-pyran-2-one (23)<sup>1</sup>:**

Synthesized from cinnamaldehyde and 1-phenyl-1,3-butanedione according to the general procedure and obtained as a yellow oil (22.7 mg, 0.08 mmol, 62% yield). The ee (87%) was measured by HPLC using chiral stationary phase [OD-H column, *n*-hexane/2-propanol (85:15), 1.0 ml/min),  $t_R$  = 10.244 min (major), 12.114 min (minor)].  $[\alpha]_D^{20}$  = +30.7 ( $c$  = 1,  $\text{CH}_2\text{Cl}_2$ ).  $^1\text{H}$  NMR (400 MHz,  $\text{CDCl}_3$ )  $\delta$  7.65-7.60 (m, 2 H), 7.55-7.49 (m, 1 H), 7.42-7.37 (m, 2 H), 7.29-7.27 (m, 1 H), 7.25-7.18 (m, 2 H) 7.16-7.12 (m, 2 H), 4.36-4.29 (m, 1 H), 3.07 (dd,  $J$  = 16.0, 7.5 Hz, 1 H), 2.93 (dd,  $J$  = 16.0, 3.5 Hz, 1 H), 1.90 (d,  $J$  = 1.90 Hz, 3H).  $^{13}\text{C}$  NMR (101 MHz,  $\text{CDCl}_3$ )  $\delta$  196.0, 166.7, 154.9, 140.1, 138.6, 133.2, 129.3, 129.0, 128.9, 127.8, 126.9, 117.9, 39.6, 36.4, 19.2.

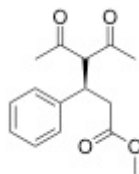

**Methyl (*R*)-4-acetyl-5-oxo-3-phenylhexanoate (24)<sup>5</sup>:**

Obtained as a white solid (19.7 mg, 0.08 mmol, 95% yield). The ee (93%) was measured by HPLC using chiral stationary phase [OJ column, *n*-hexane/2-propanol (80:20), 1.0 ml/min),  $t_R$  = 18.583 min (minor), 30.938 min (major)]  $[\alpha]_D^{20}$  = -96 ( $c$  = 0.28,  $\text{CH}_2\text{Cl}_2$ ).  $^1\text{H}$  NMR (400 MHz,  $\text{CDCl}_3$ )  $\delta$  7.32-7.26 (m, 3H), 7.23-7.16 (m, 3 H), 4.28-4.21 (m, 1H), 4.01-3.93 (m, 1 H), 3.52 (s, 3 H), 2.59 (dd,  $J$  = 14.2, 6.9 Hz, 1H), 2.26 (s, 3 H), 1.83 (s, 3 H).  $^{13}\text{C}$  NMR (101 MHz,  $\text{CDCl}_3$ )  $\delta$  203.0, 202.8, 171.6, 139.8, 129.0, 128.1, 127.6, 74.2, 51.8, 41.7, 39.3, 30.0, 29.7.



# NMR spectra of compounds

<sup>1</sup>H NMR (CDCl<sub>3</sub>)

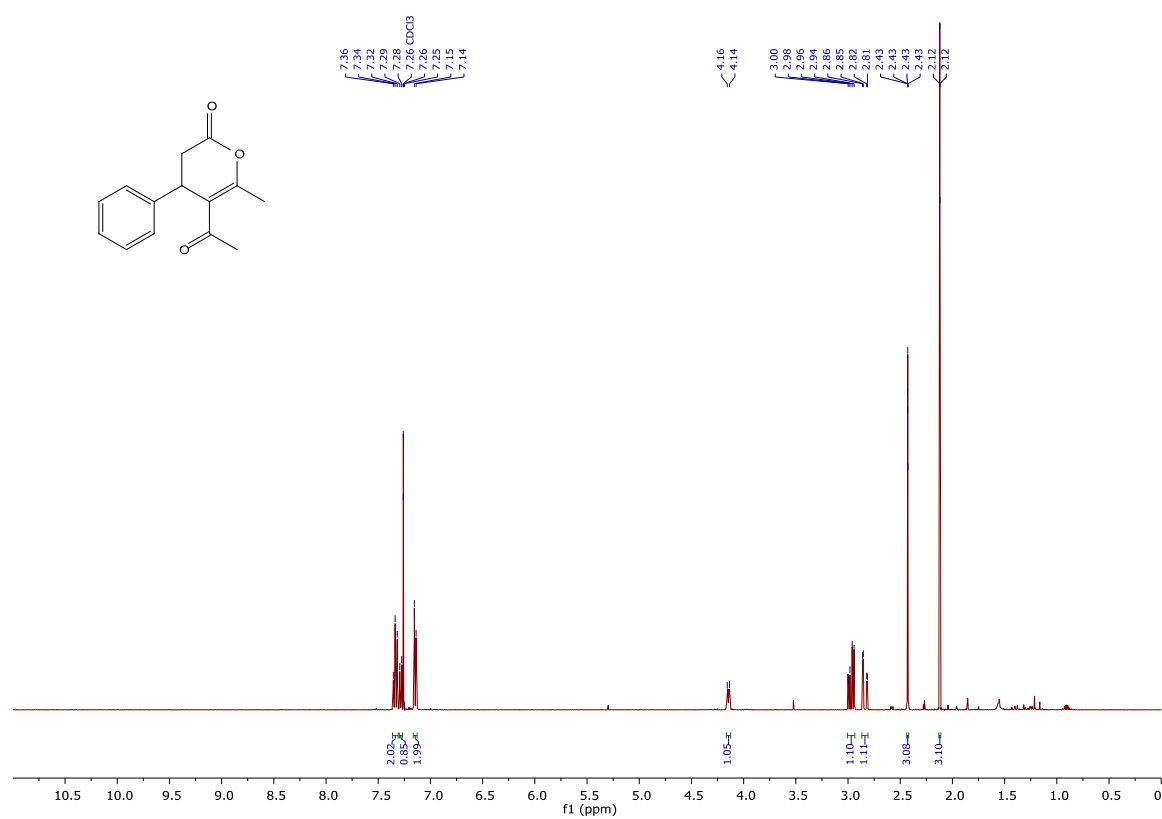

<sup>13</sup>C NMR (CDCl<sub>3</sub>)

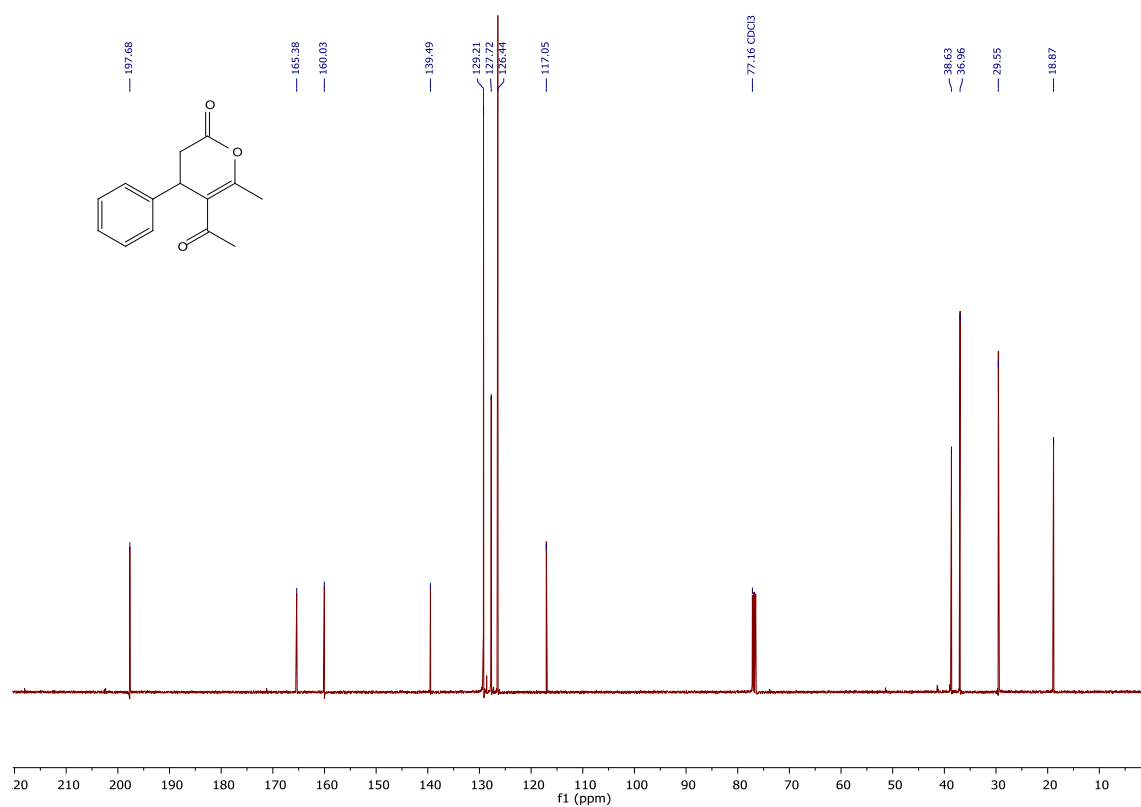

$^1\text{H}$  NMR ( $\text{CDCl}_3$ )

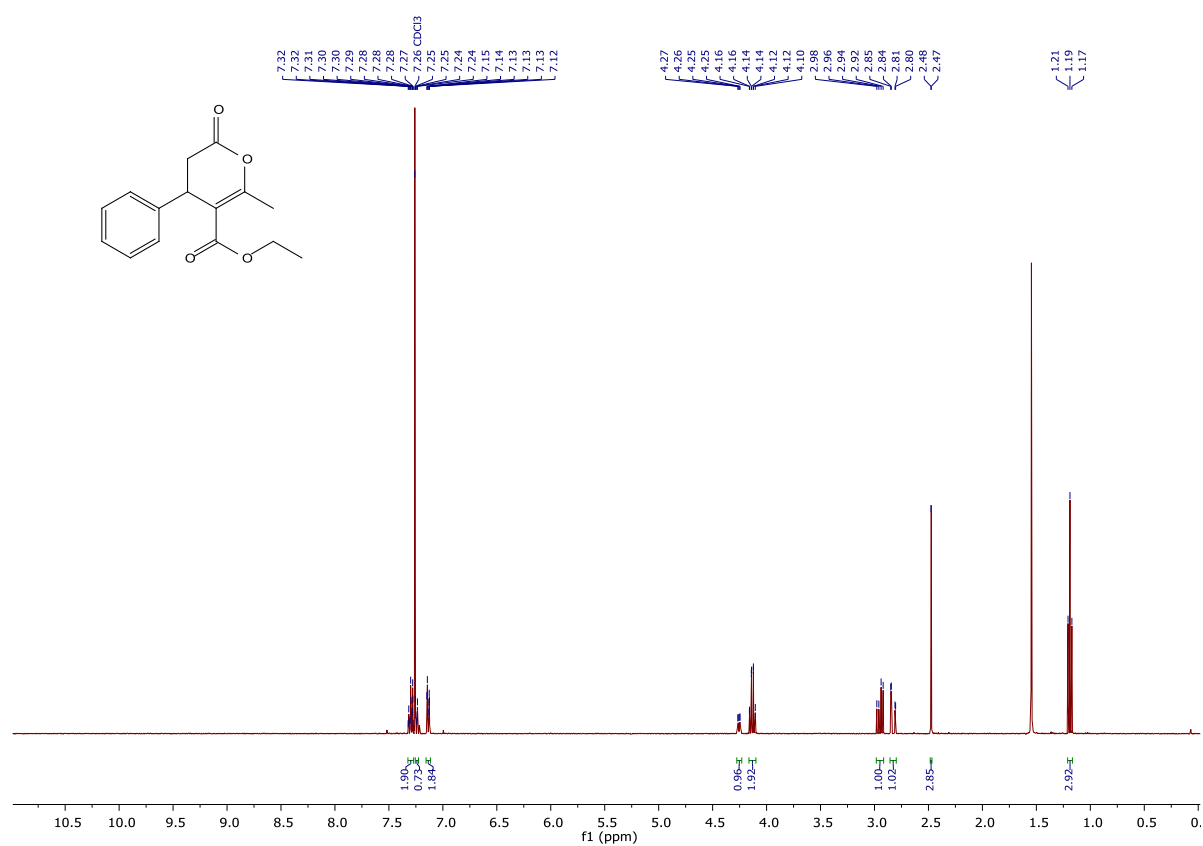

$^{13}\text{C}$  NMR ( $\text{CDCl}_3$ )

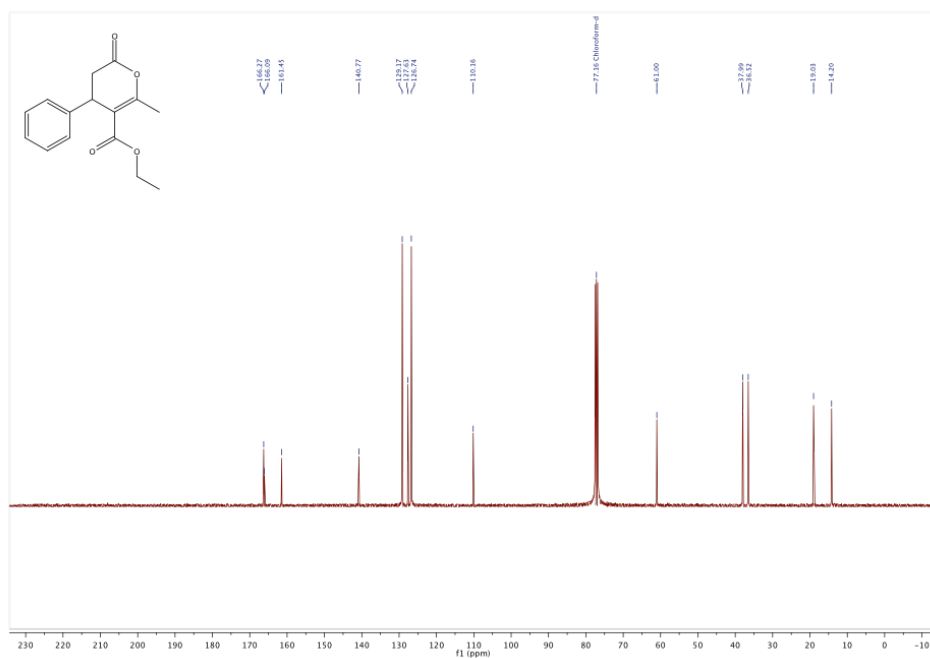

$^1\text{H}$  NMR ( $\text{CDCl}_3$ )

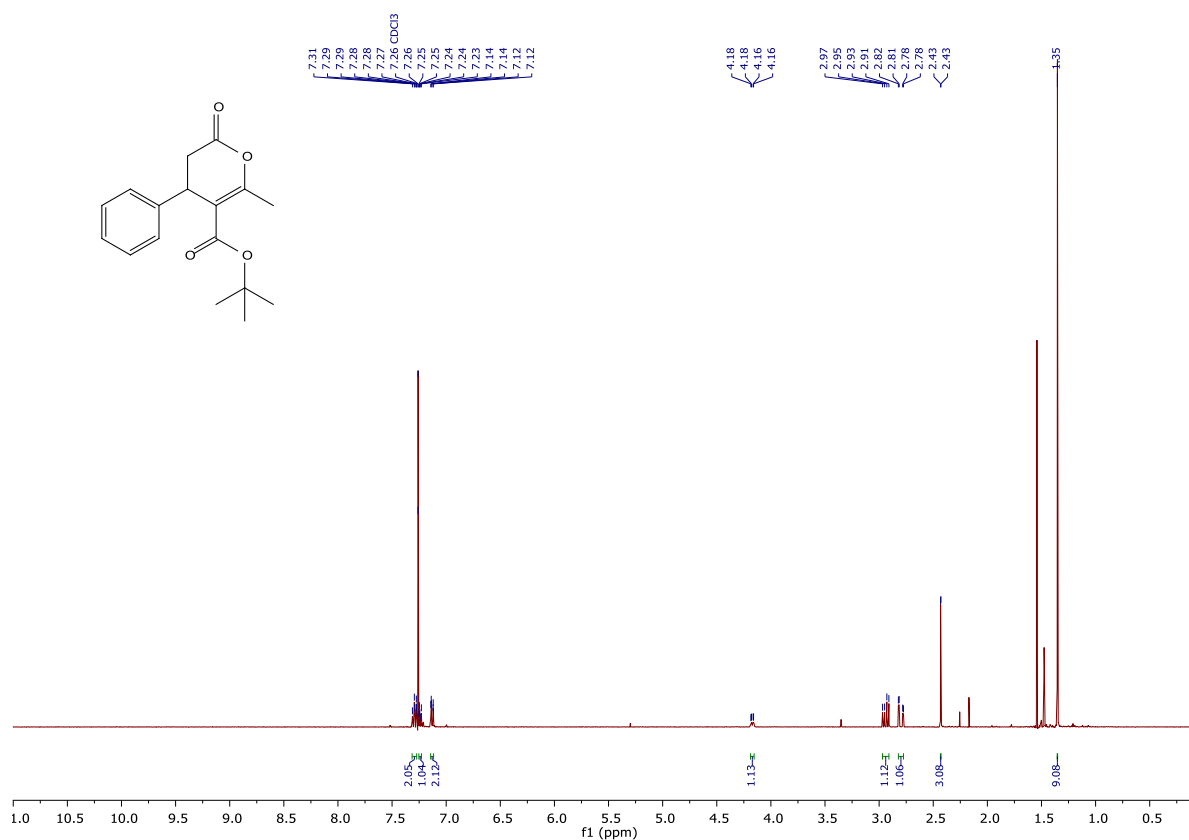

$^{13}\text{C}$  NMR ( $\text{CDCl}_3$ )

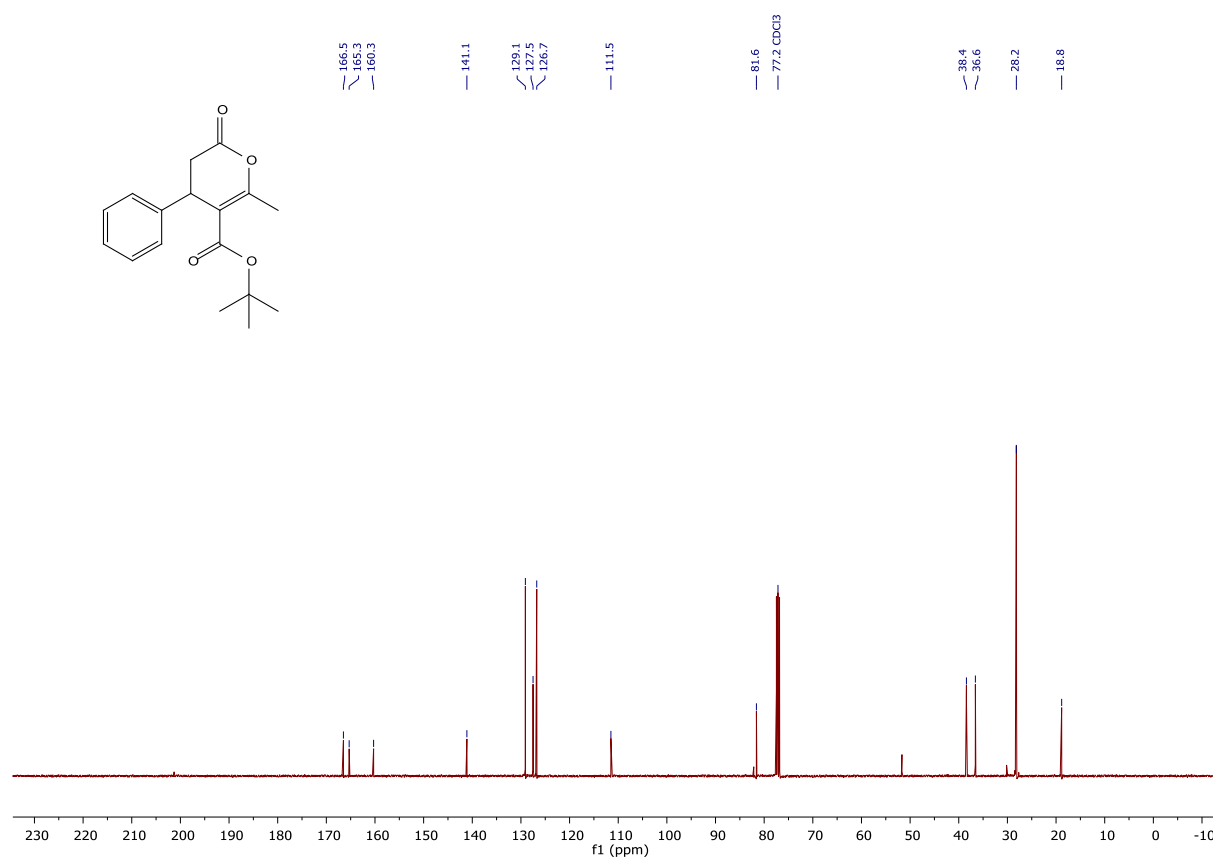

$^1\text{H}$  NMR ( $\text{CDCl}_3$ )

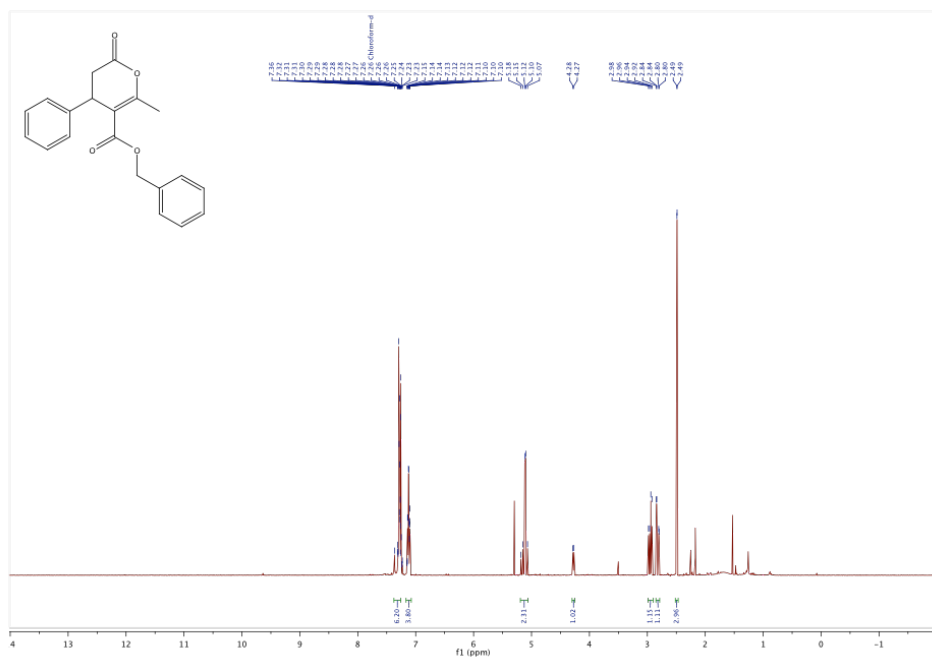

$^{13}\text{C}$  NMR ( $\text{CDCl}_3$ )

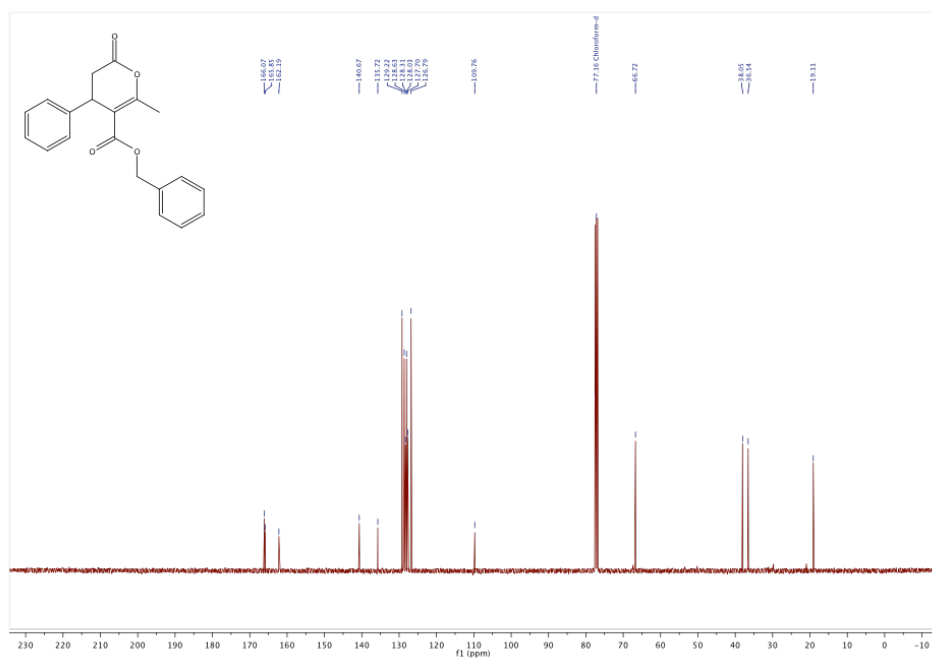

$^1\text{H}$  NMR ( $\text{CDCl}_3$ )

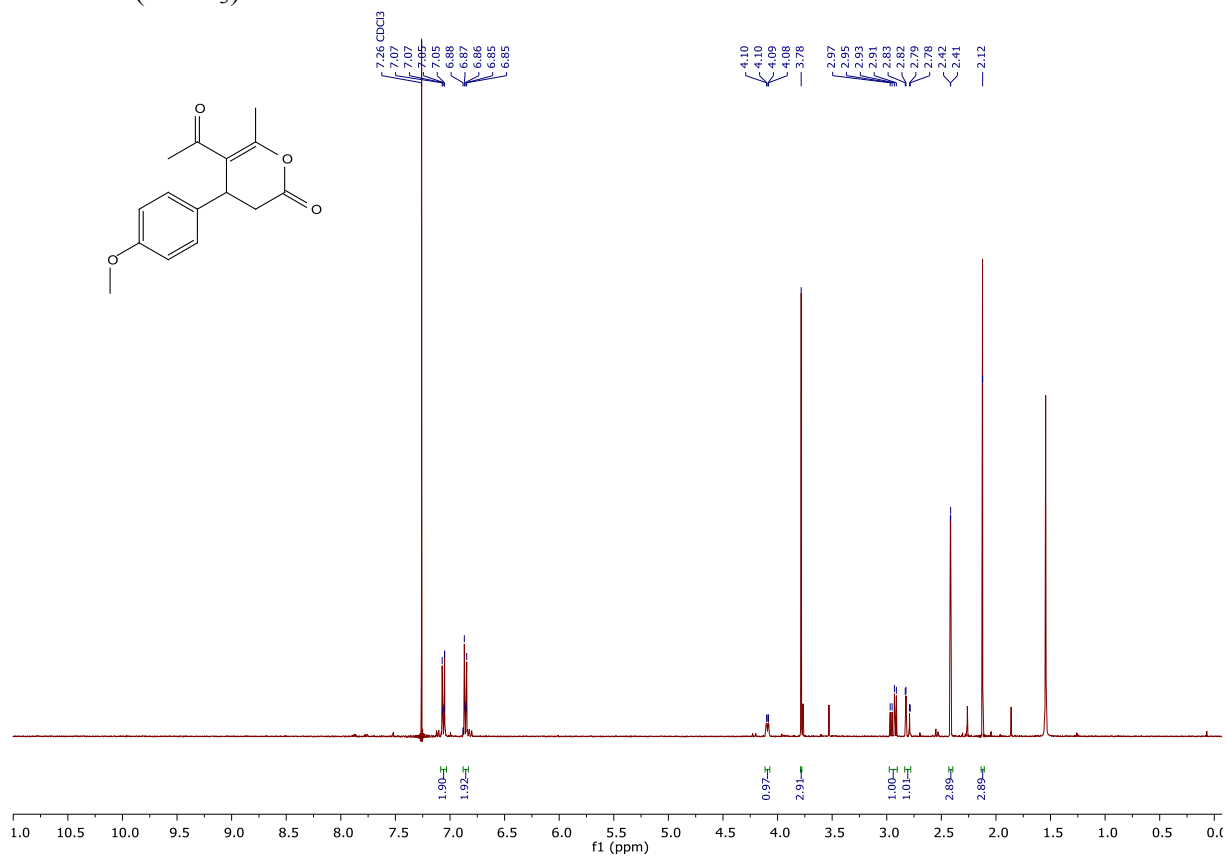

$^{13}\text{C}$  NMR ( $\text{CDCl}_3$ )

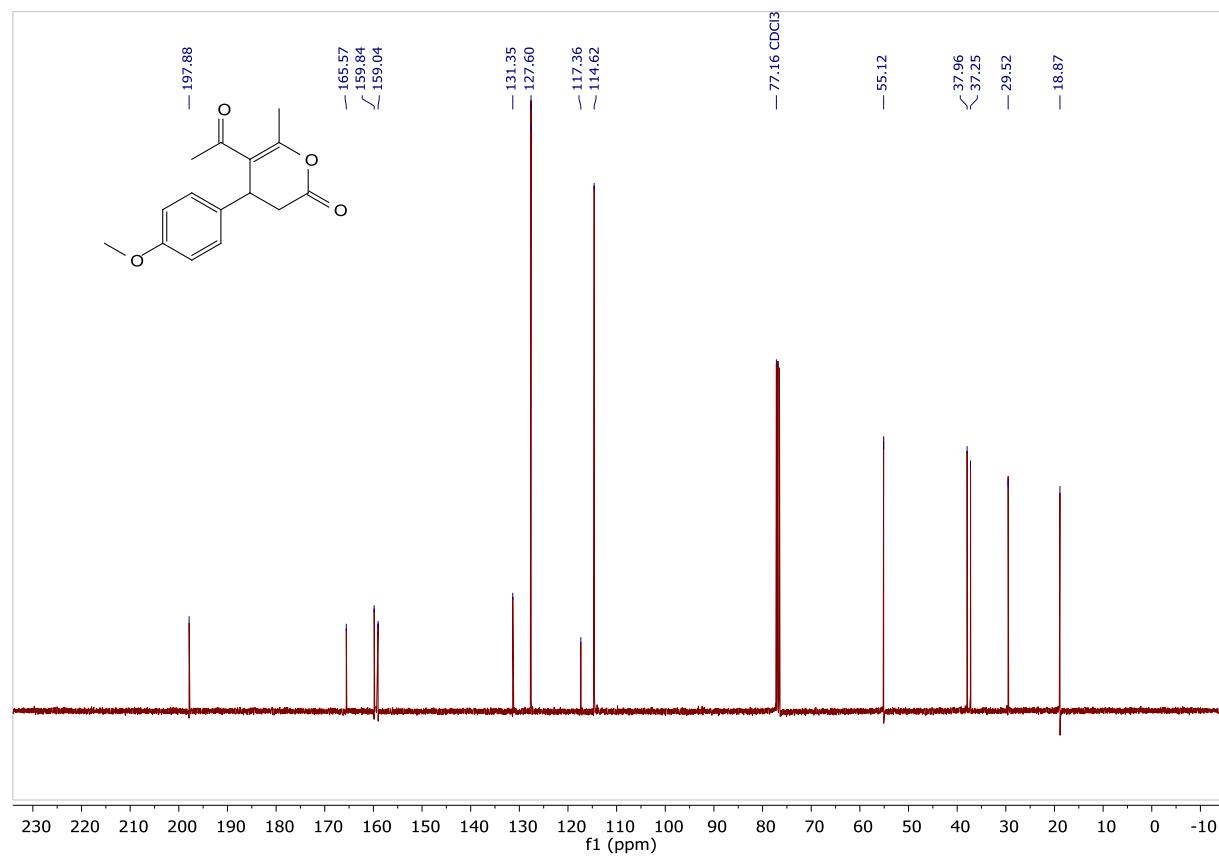

$^1\text{H}$  NMR ( $\text{CDCl}_3$ )

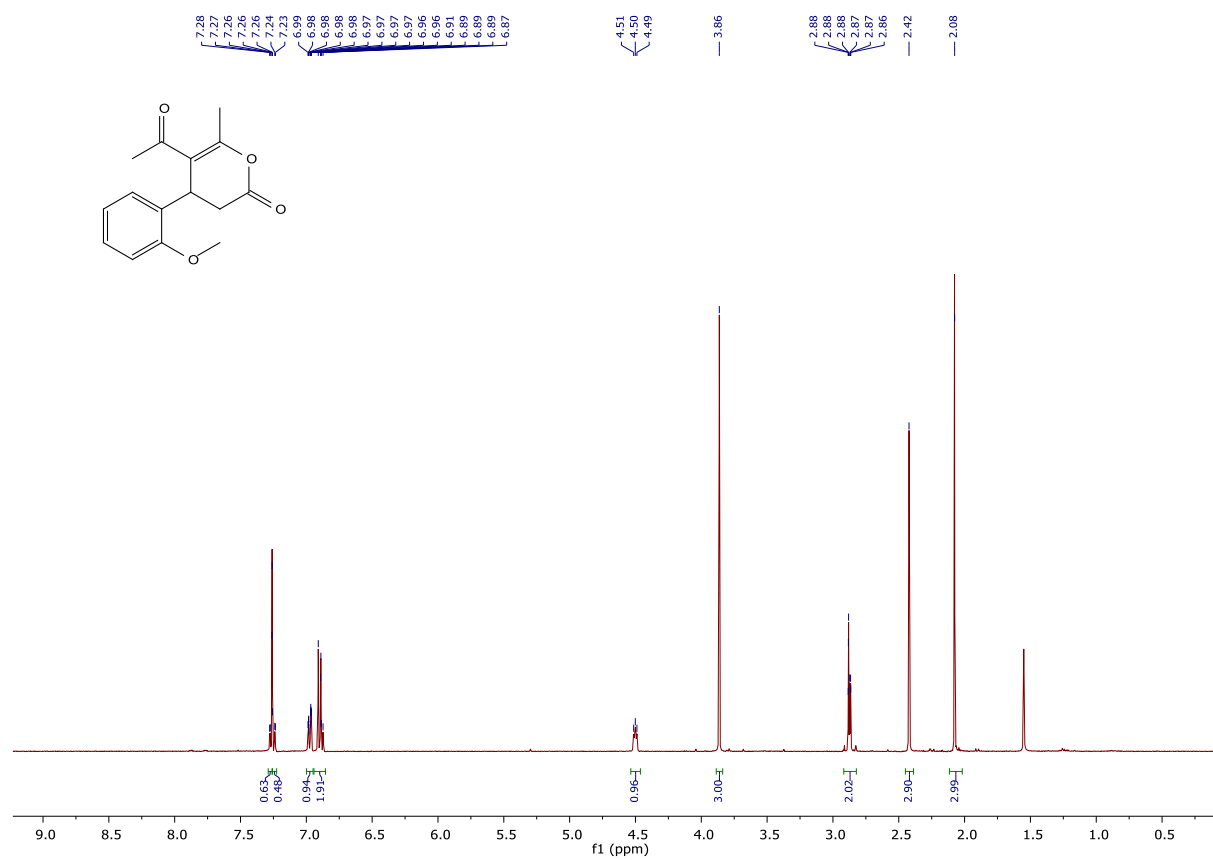

$^{13}\text{C}$  NMR ( $\text{CDCl}_3$ )

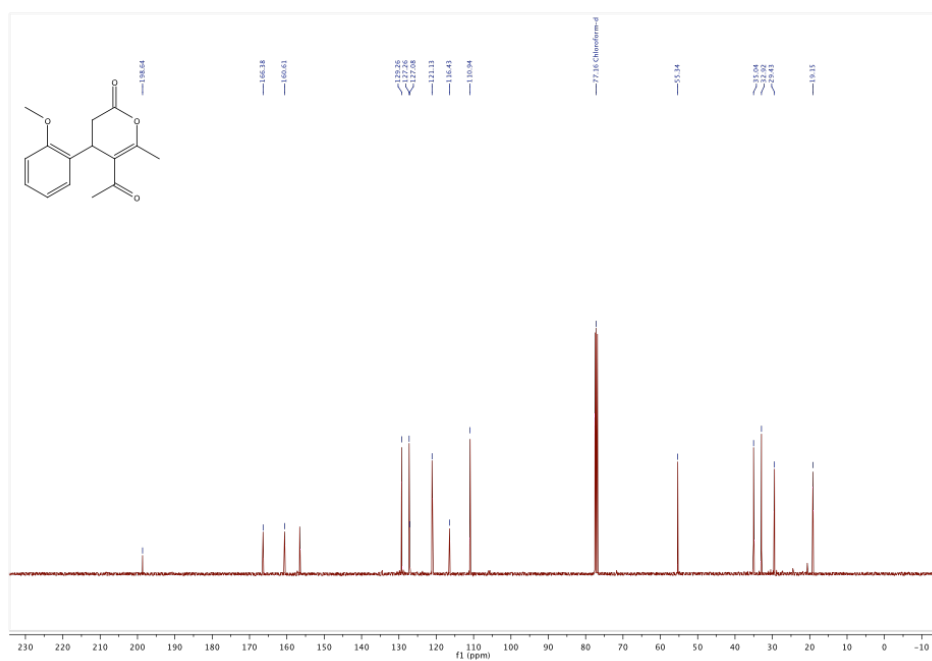

<sup>1</sup>H NMR (CDCl<sub>3</sub>)

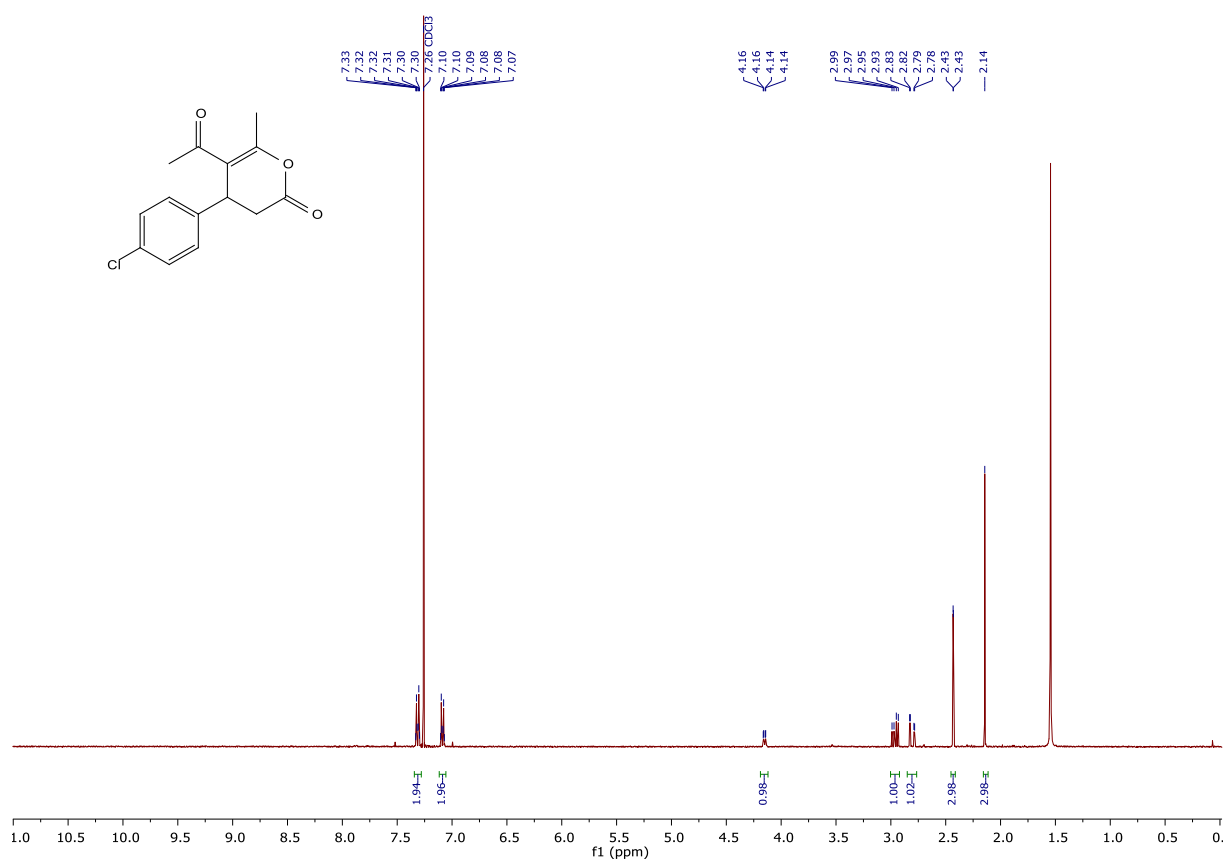

<sup>13</sup>C NMR (CDCl<sub>3</sub>)

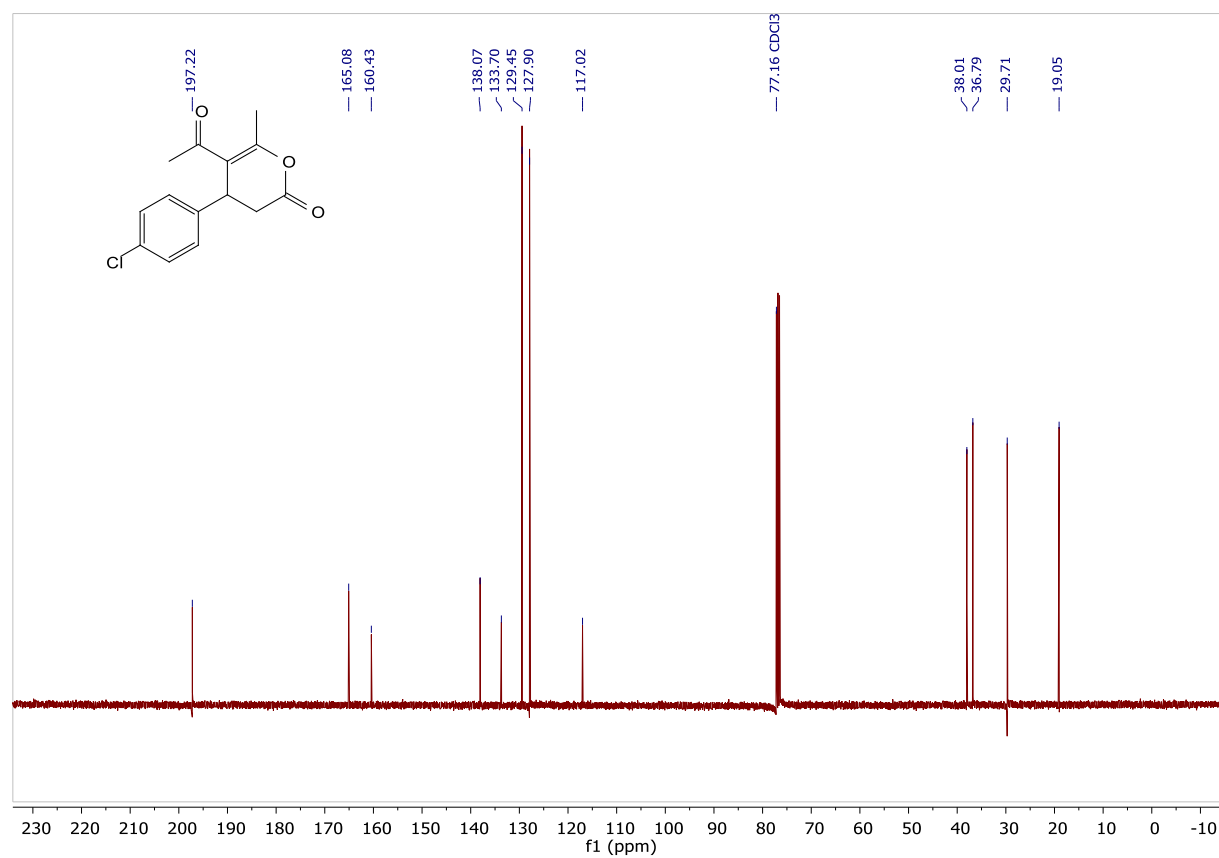

CC1=C(C(=O)OCC1C(=O)c2ccc([N+](=O)[O-])cc2)C

<sup>1</sup>H NMR spectrum (CDCl<sub>3</sub>) of 4-(4-nitrophenyl)-6-methyl-2H-pyran-2-one. The spectrum shows peaks at 8.22, 8.21, 8.20, 8.19, 7.36, 7.35, 7.34, 7.33, 7.32, 7.29, 4.35, 4.34, 4.33, 3.05, 3.03, 3.01, 2.99, 2.97, 2.86, 2.83, 2.82, 2.48, 2.47, and 2.21 ppm. Integration values are 1.81, 1.89, 1.00, 1.00, 2.87, and 2.87. The chemical structure is shown in the top left.

CC1=C(C(=O)O)C(=O)C(C1)C2=CC=C([N+](=O)[O-])C=C2

13C NMR spectrum (DMSO-d<sub>6</sub>) of 2-methyl-2-(4-nitrophenyl)-1,3-dioxane-4-carboxylic acid. The spectrum shows peaks at the following chemical shifts (ppm): 196.72, 164.86, 163.43, 147.39, 127.93, 124.82, 117.31, 77.44 (triplet), 38.45, 36.46, 36.02, and 19.71.



$^1\text{H}$  NMR ( $\text{CDCl}_3$ )

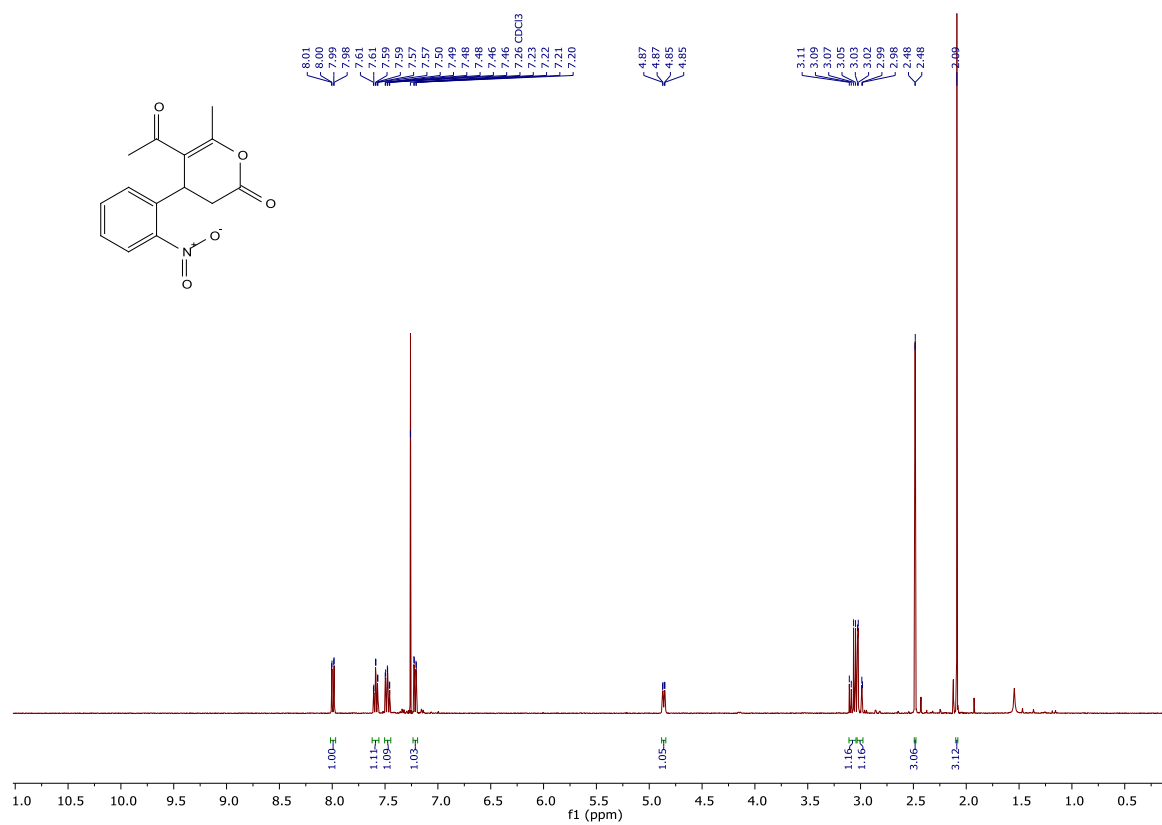

$^{13}\text{C}$  NMR ( $\text{CDCl}_3$ )

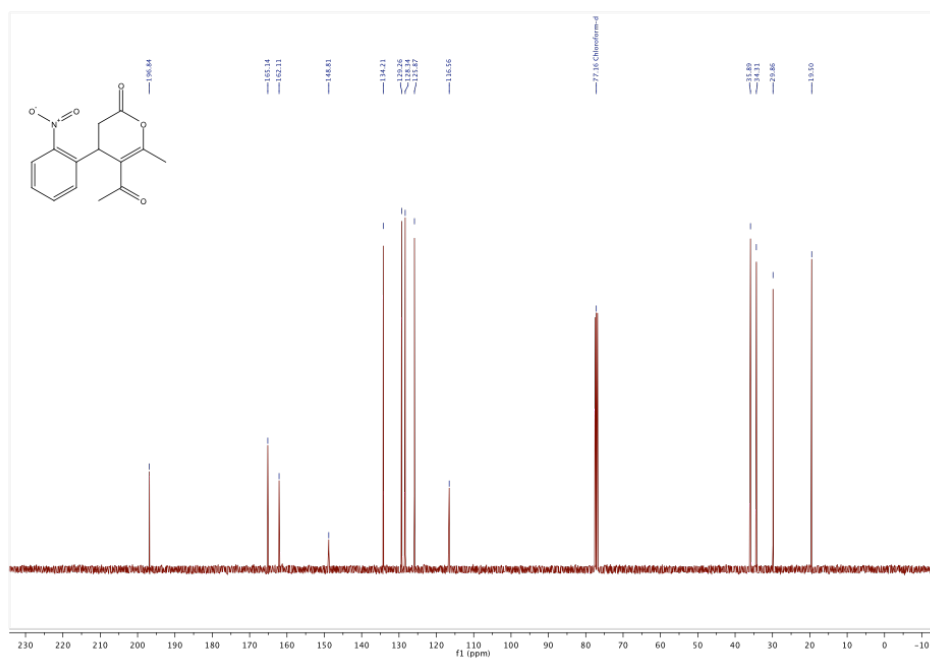

$^1\text{H}$  NMR ( $\text{CDCl}_3$ )

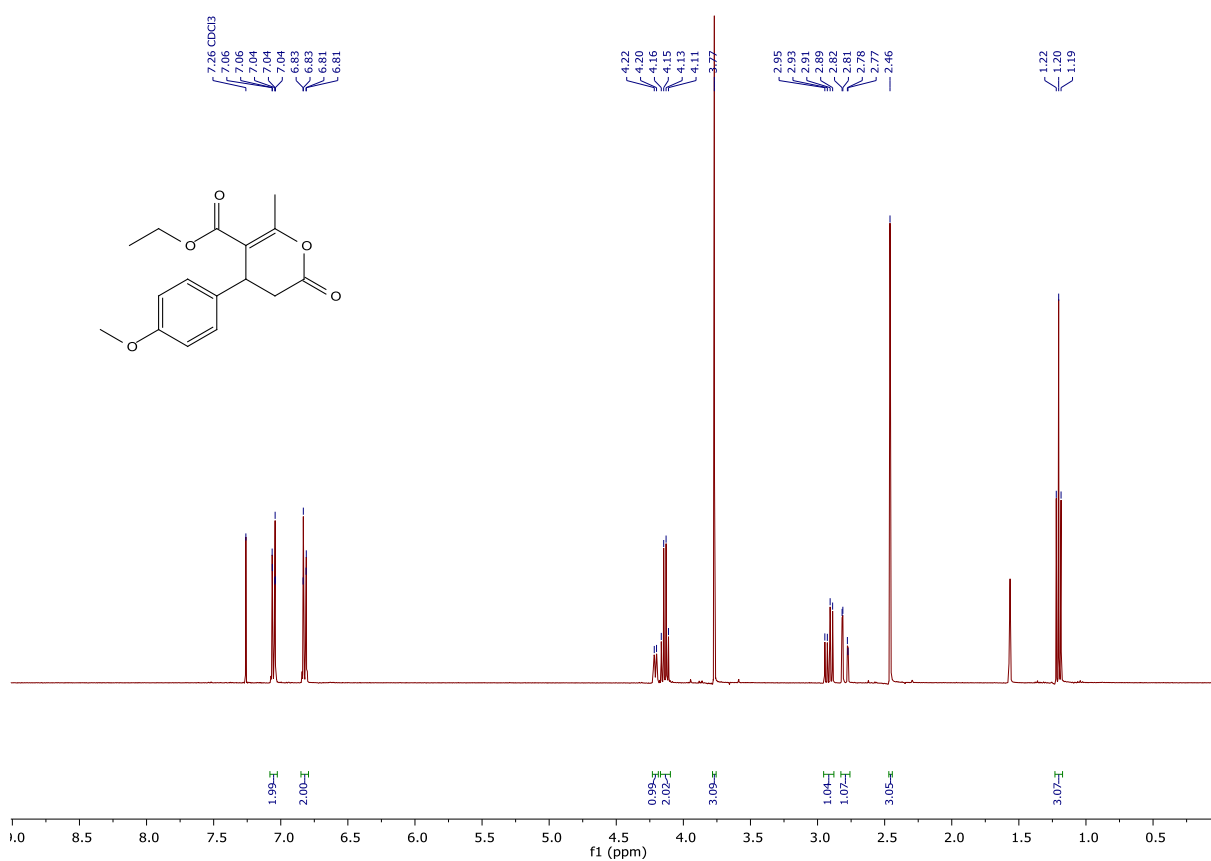

$^{13}\text{C}$  NMR ( $\text{CDCl}_3$ )

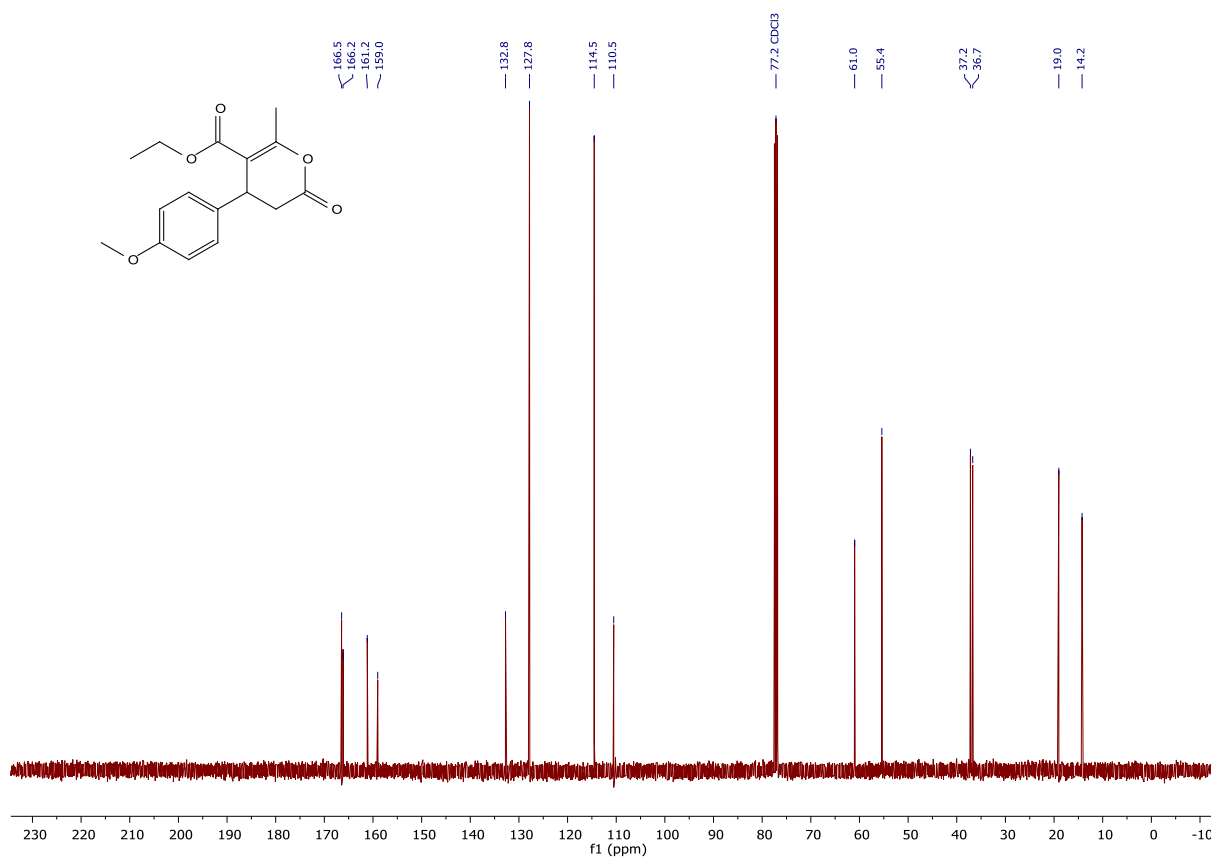

<sup>1</sup>H NMR(CDCl<sub>3</sub>)

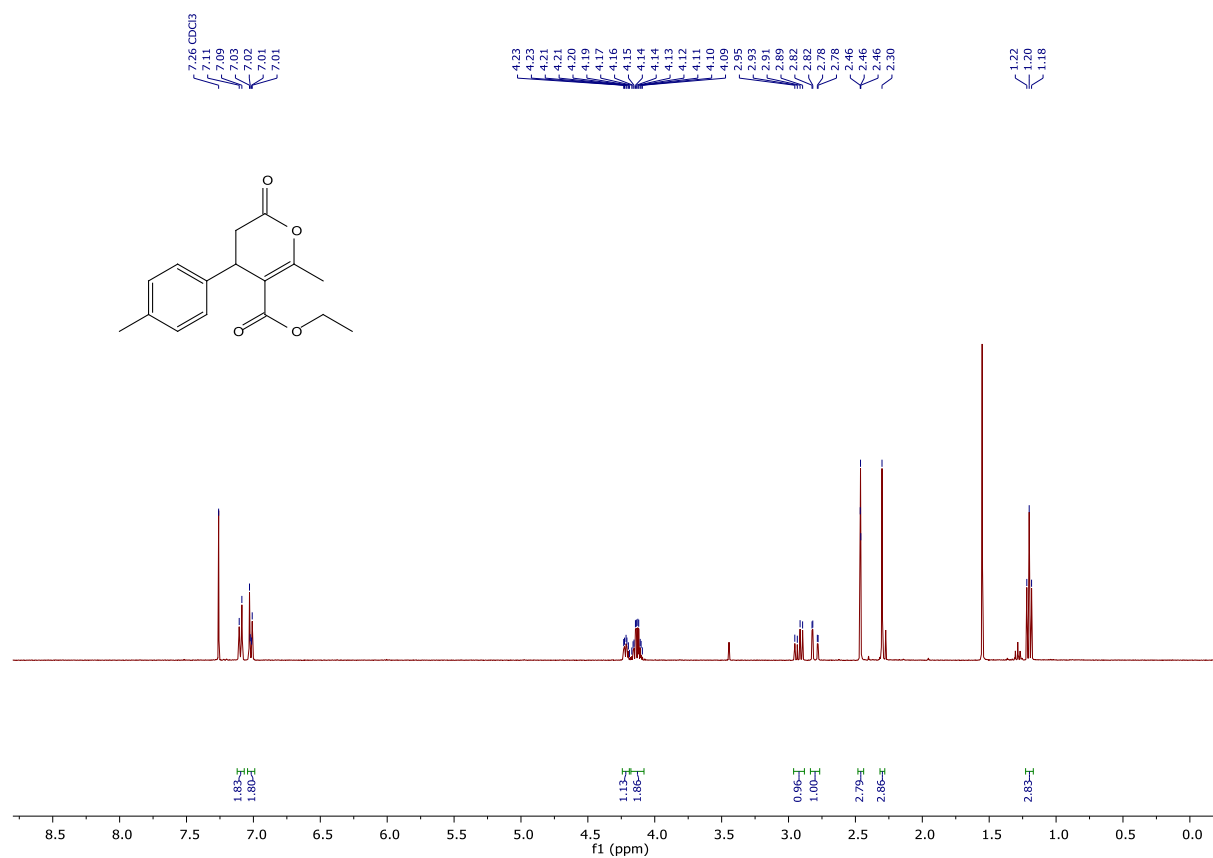

<sup>13</sup>C NMR (CDCl<sub>3</sub>)

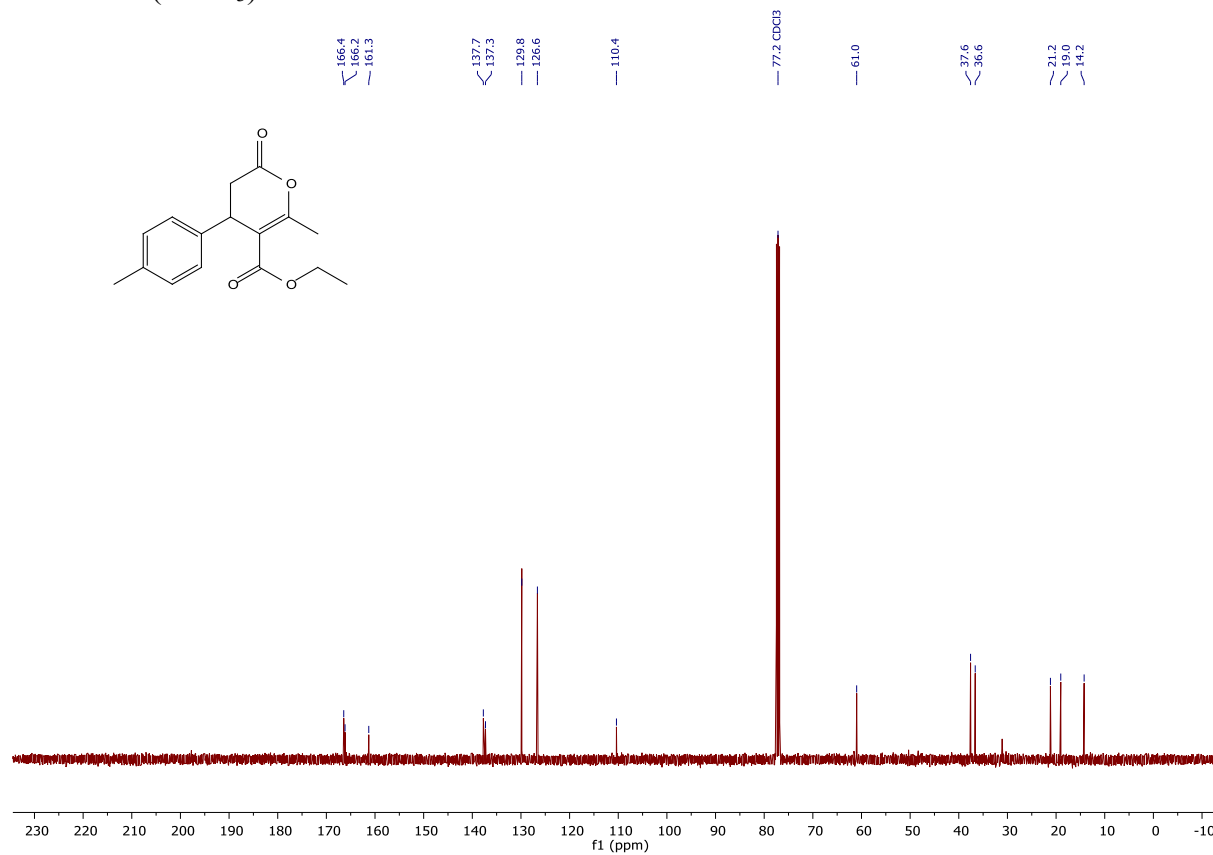

$^1\text{H}$  NMR ( $\text{CDCl}_3$ )

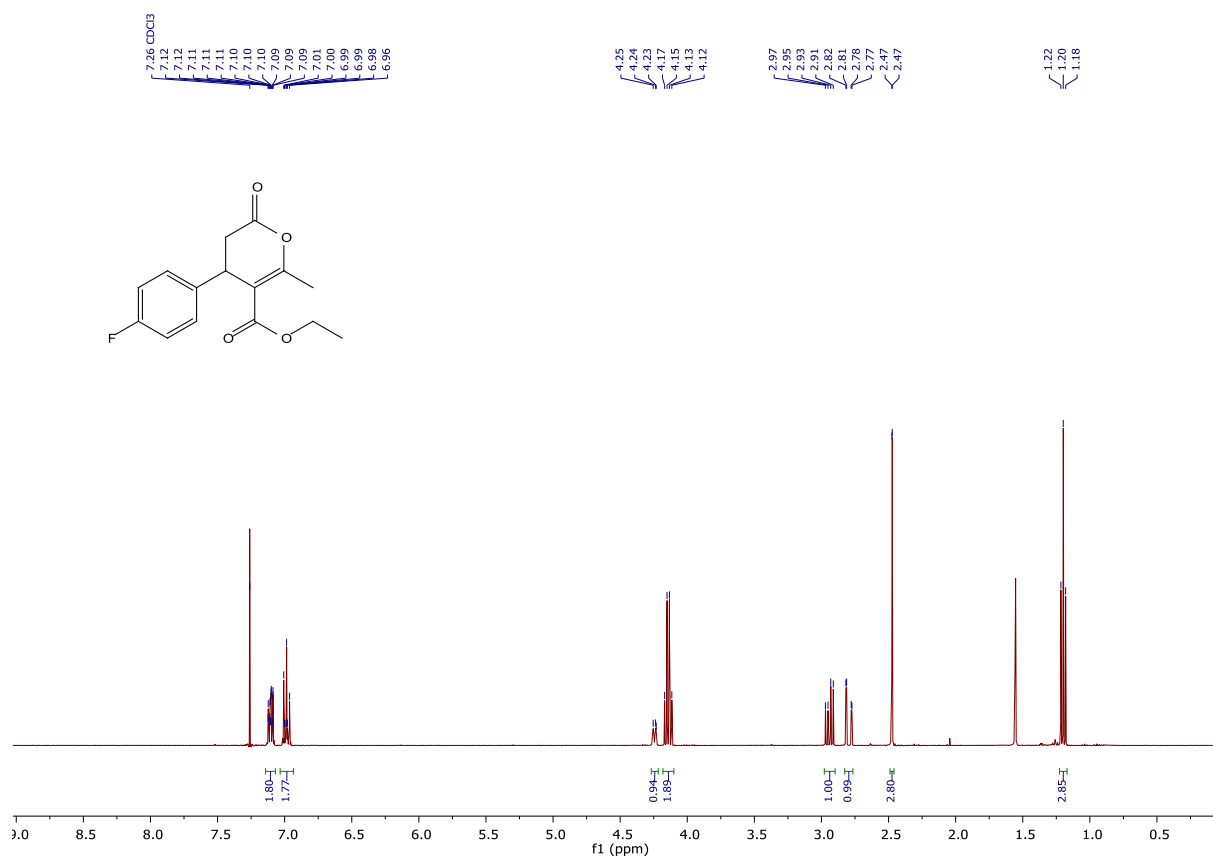

$^{13}\text{C}$  NMR ( $\text{CDCl}_3$ )

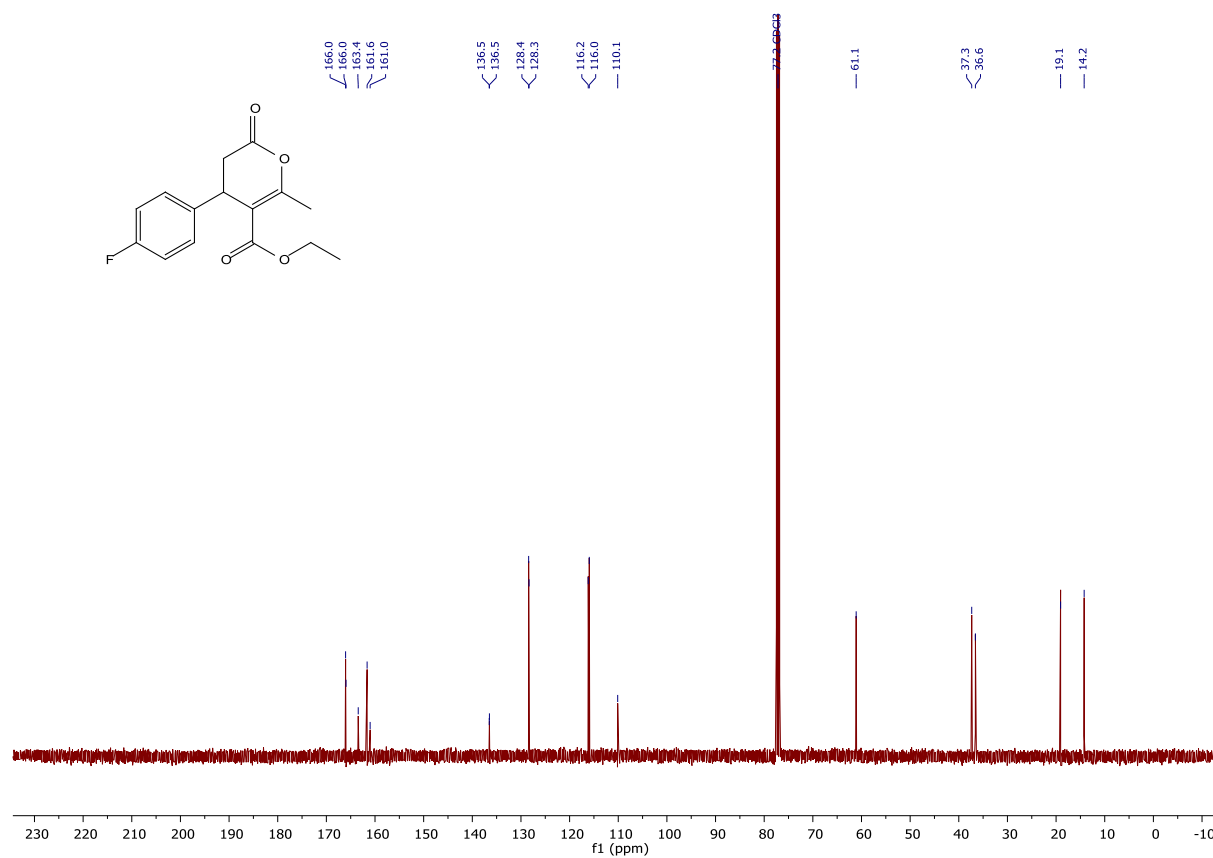

$^{19}\text{F}$  NMR ( $\text{CDCl}_3$ )

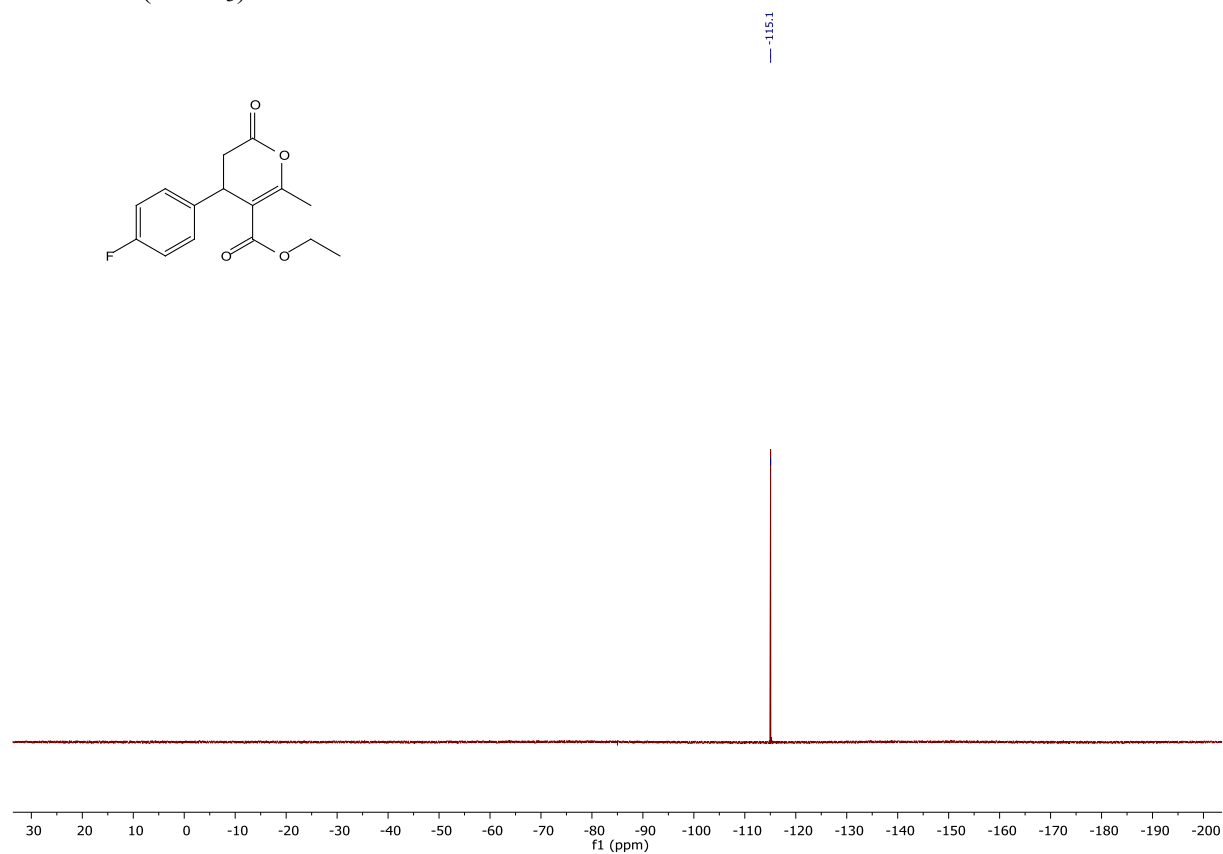

$^1\text{H}$  NMR ( $\text{CDCl}_3$ )

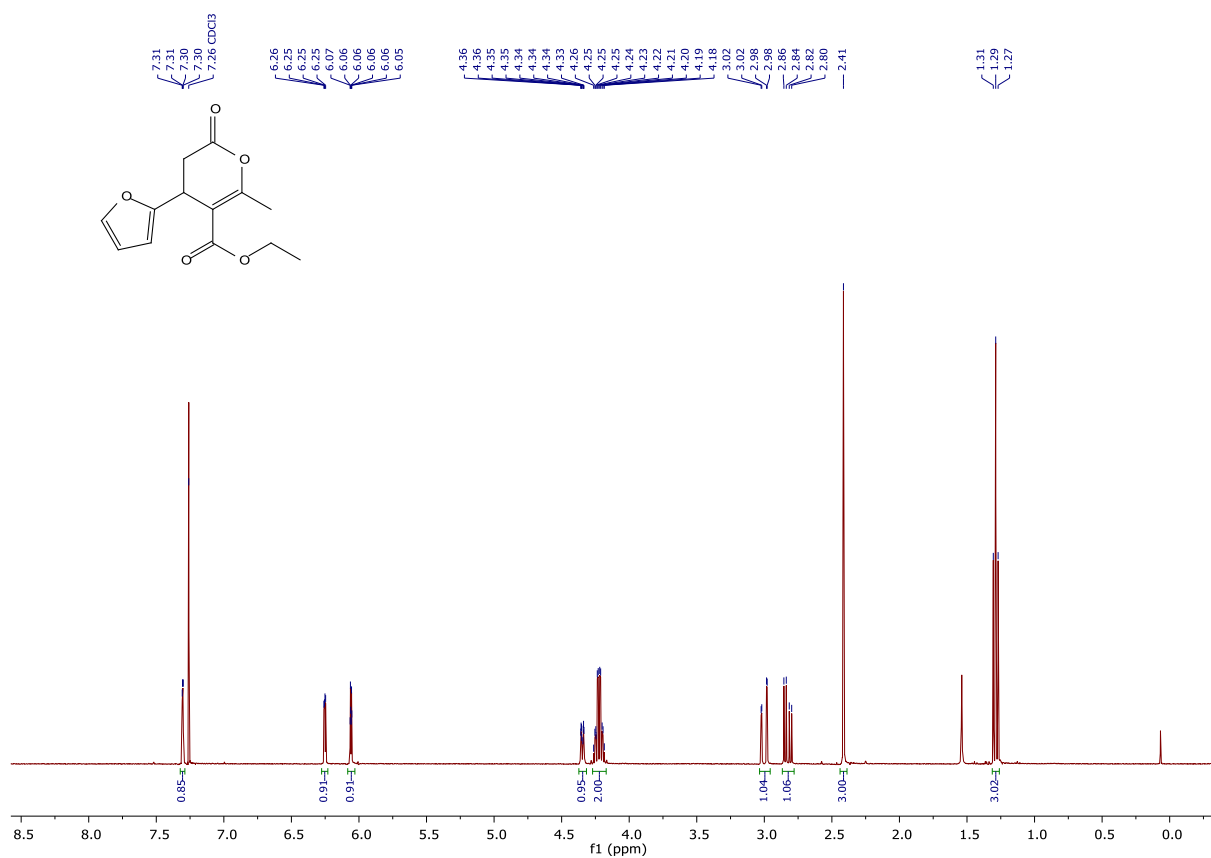

$^{13}\text{C}$  NMR ( $\text{CDCl}_3$ )

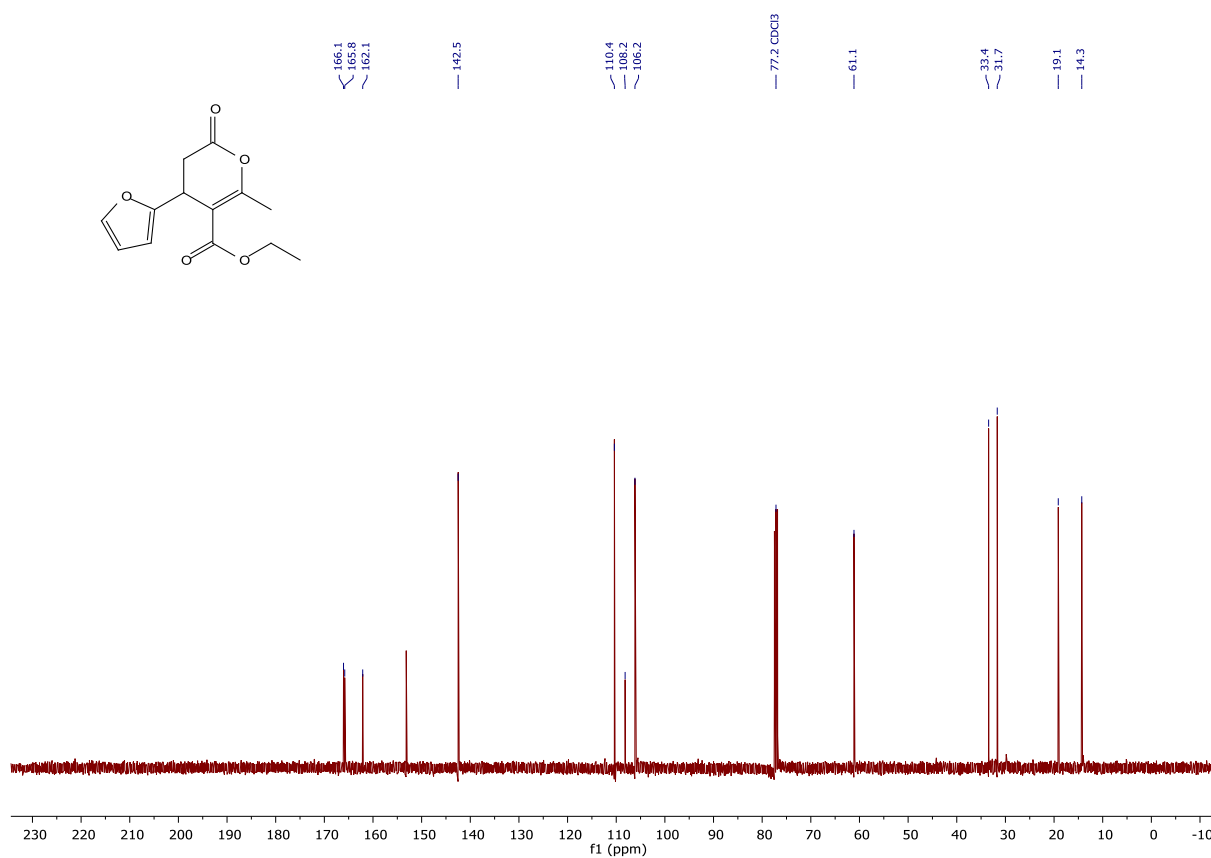

$^1\text{H}$  NMR ( $\text{CDCl}_3$ )

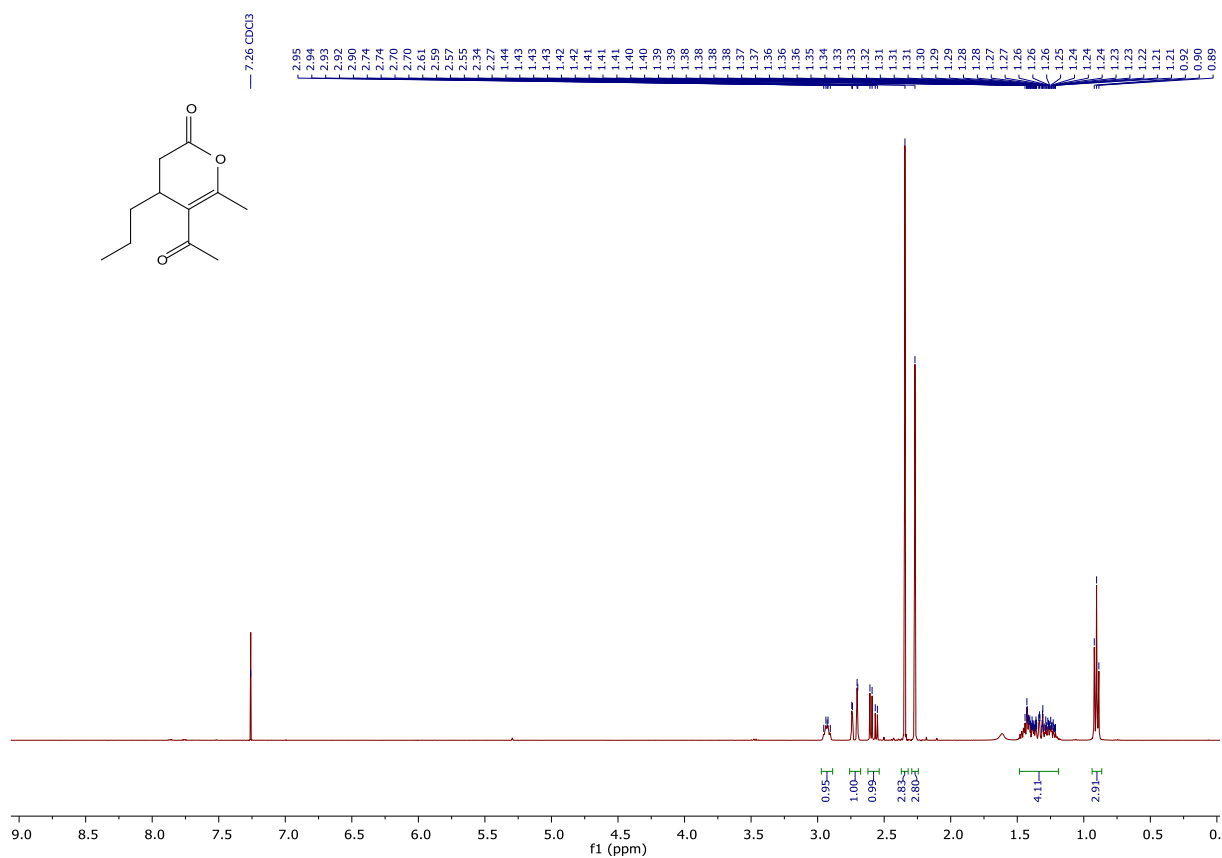

$^{13}\text{C}$  NMR ( $\text{CDCl}_3$ )

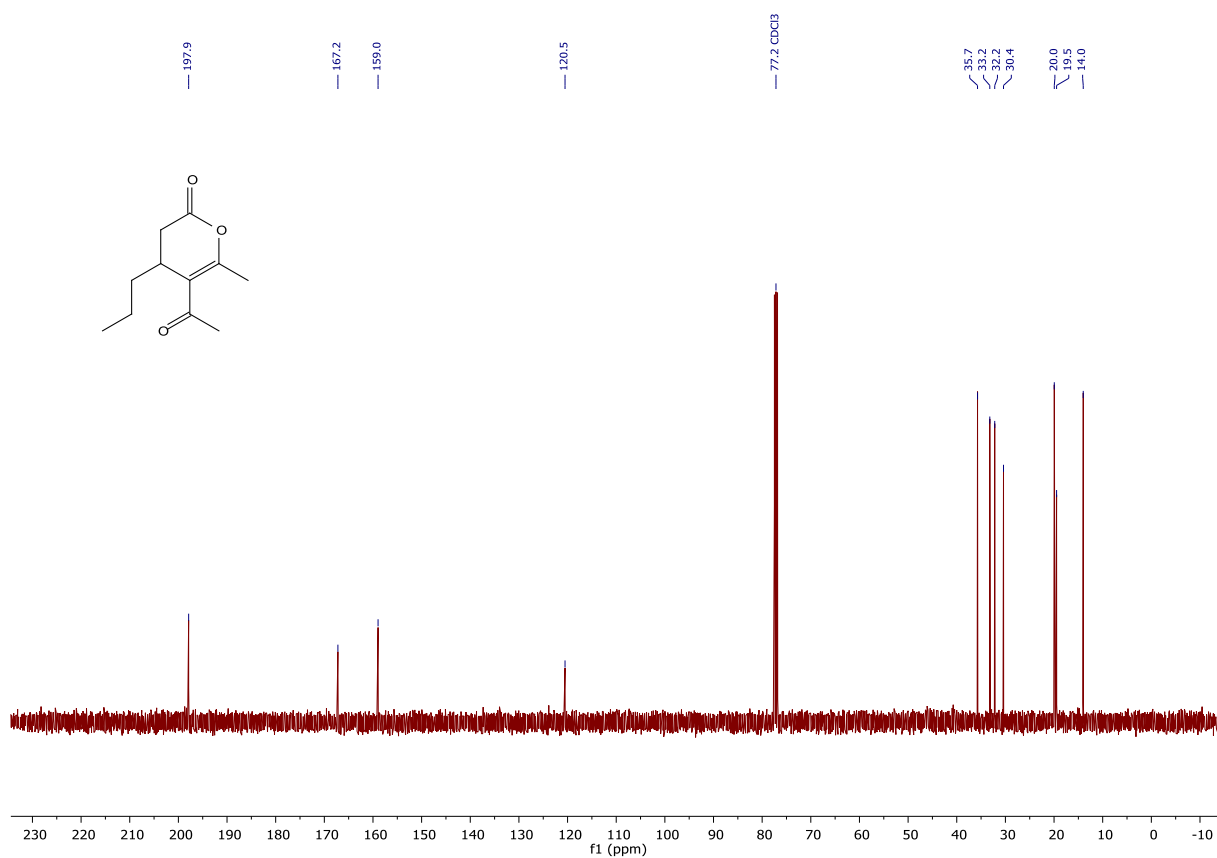

<sup>1</sup>H NMR (CDCl<sub>3</sub>)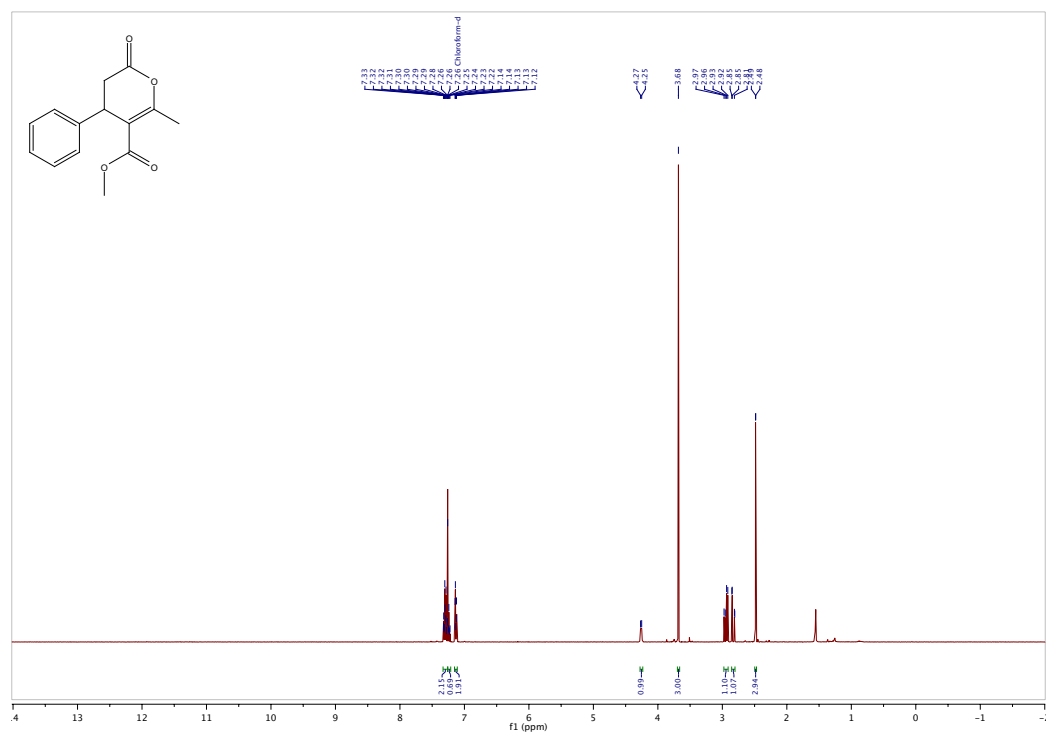 $^{13}\text{C}$  NMR ( $\text{CDCl}_3$ )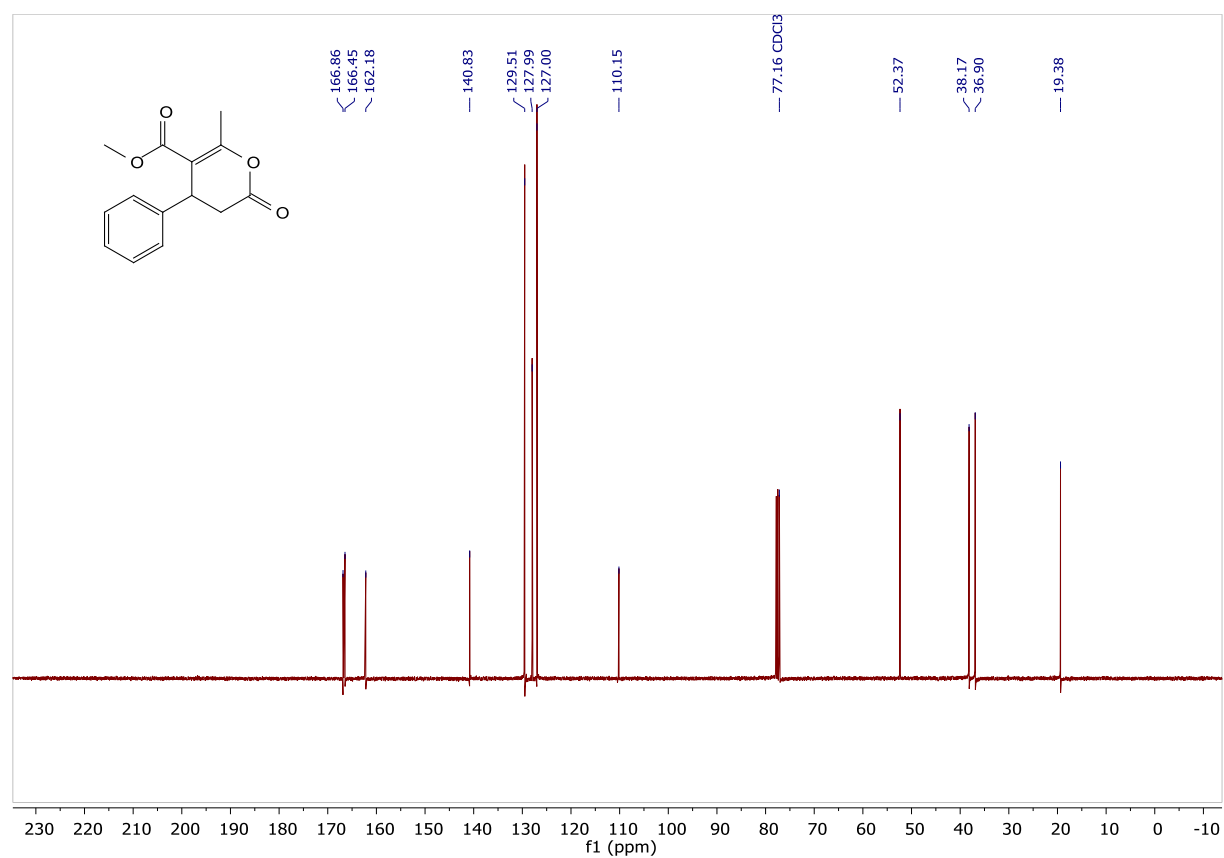



$^1\text{H}$  NMR ( $\text{CDCl}_3$ )

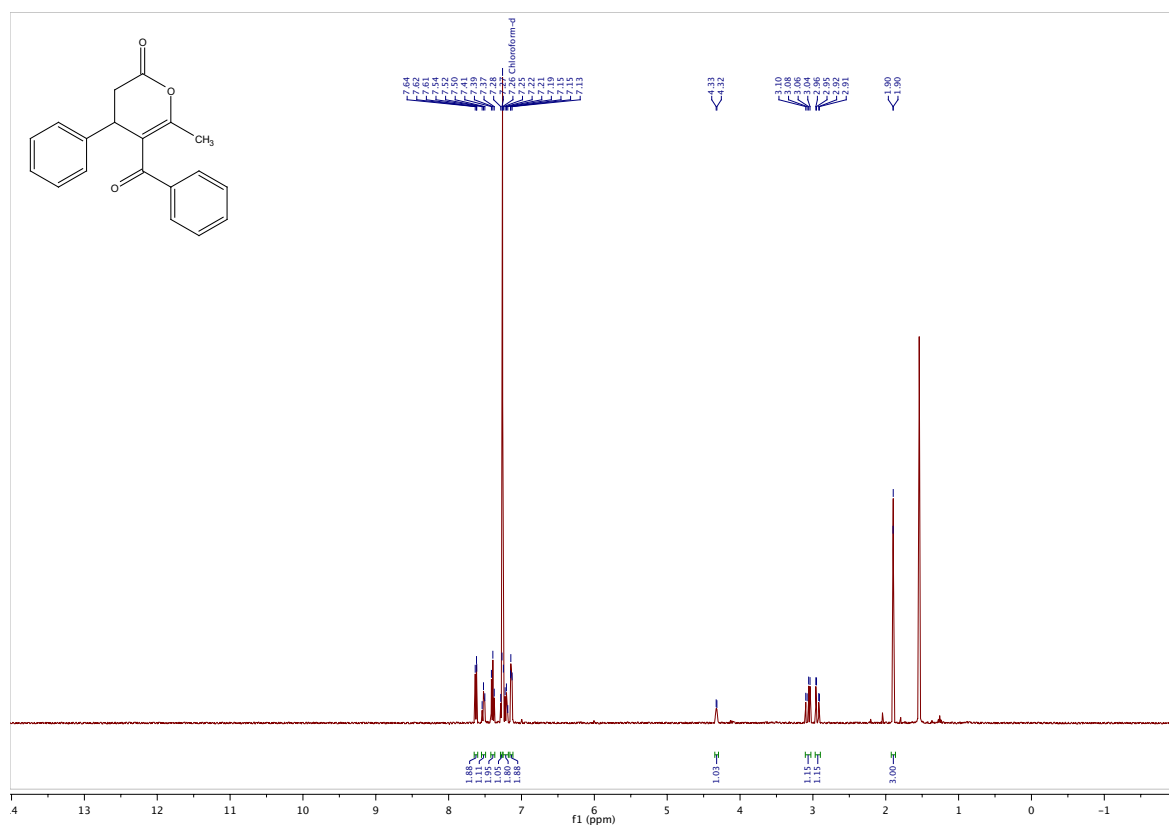

$^{13}\text{C}$  NMR ( $\text{CDCl}_3$ )

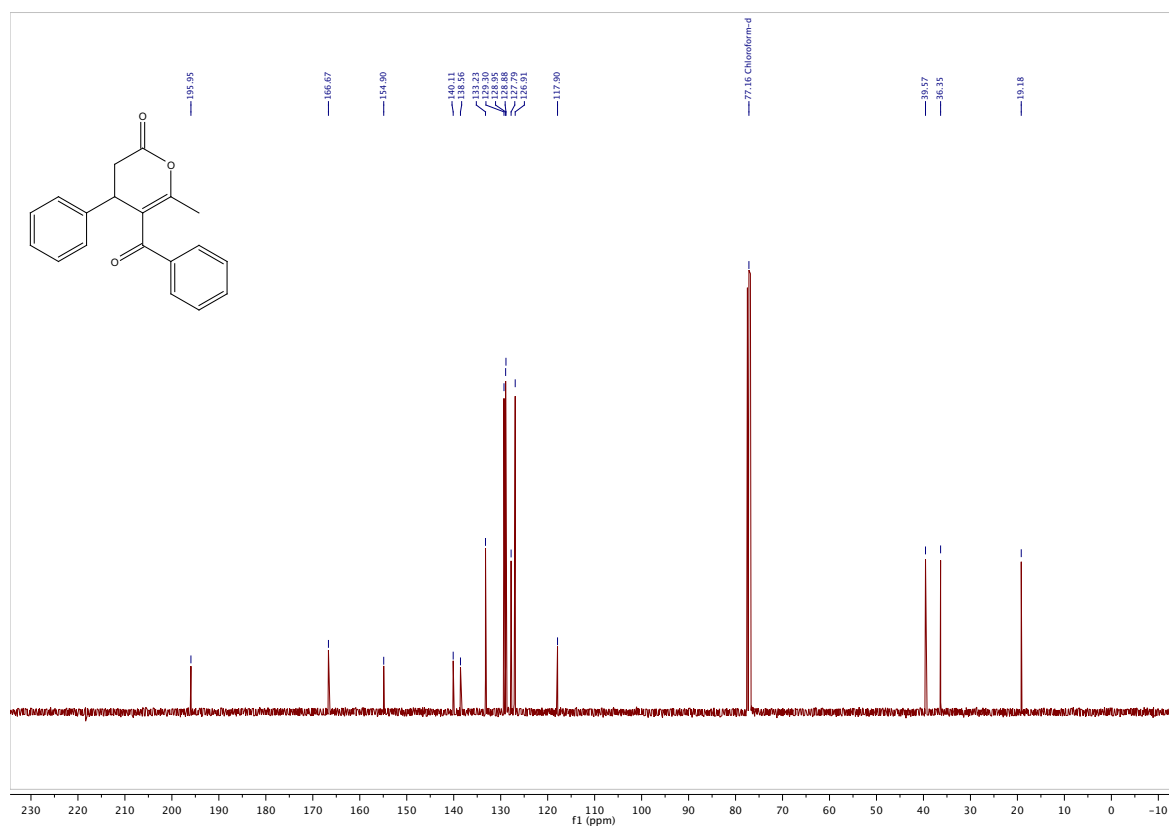

HMBC NMR (CDCl<sub>3</sub>)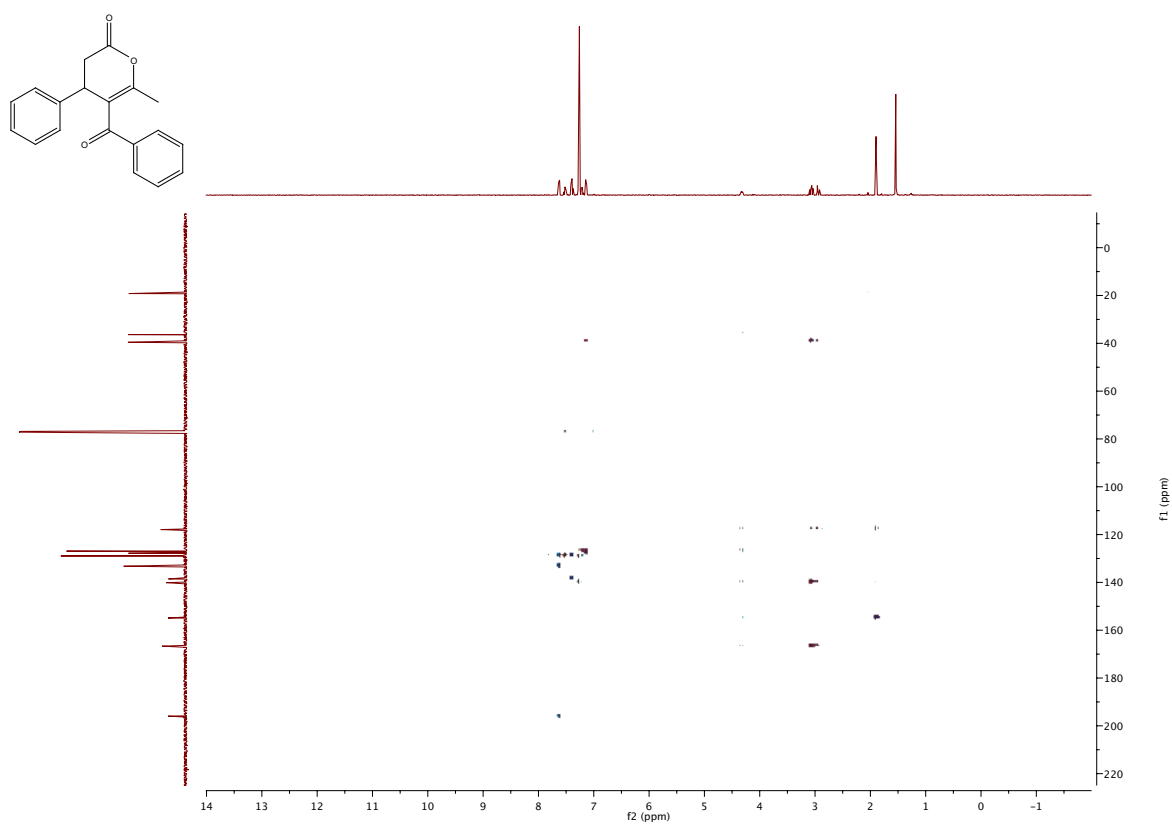<sup>1</sup>H NMR (CDCl<sub>3</sub>)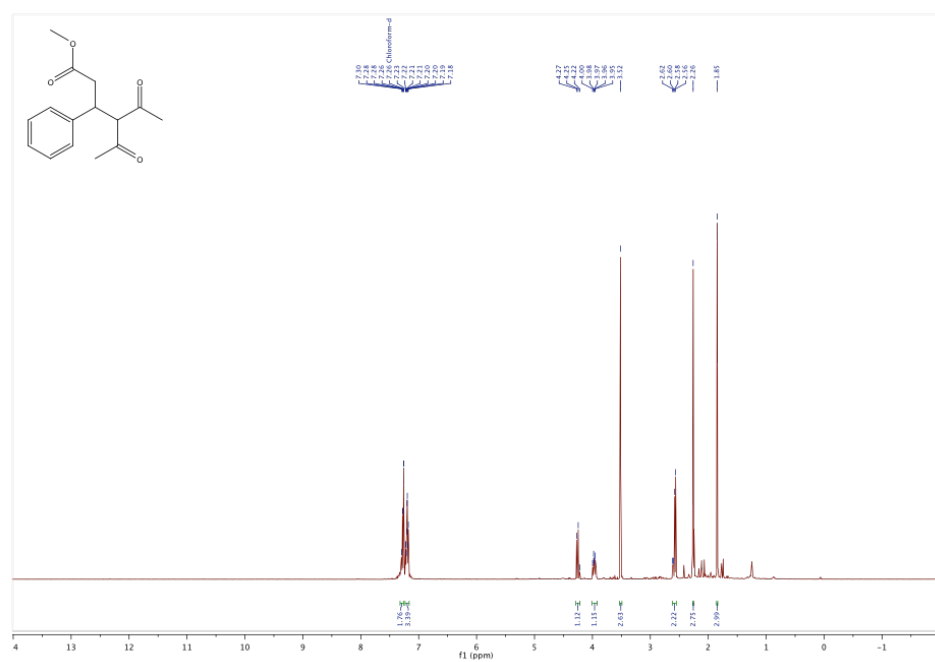

$^{13}\text{C}$  NMR ( $\text{CDCl}_3$ )

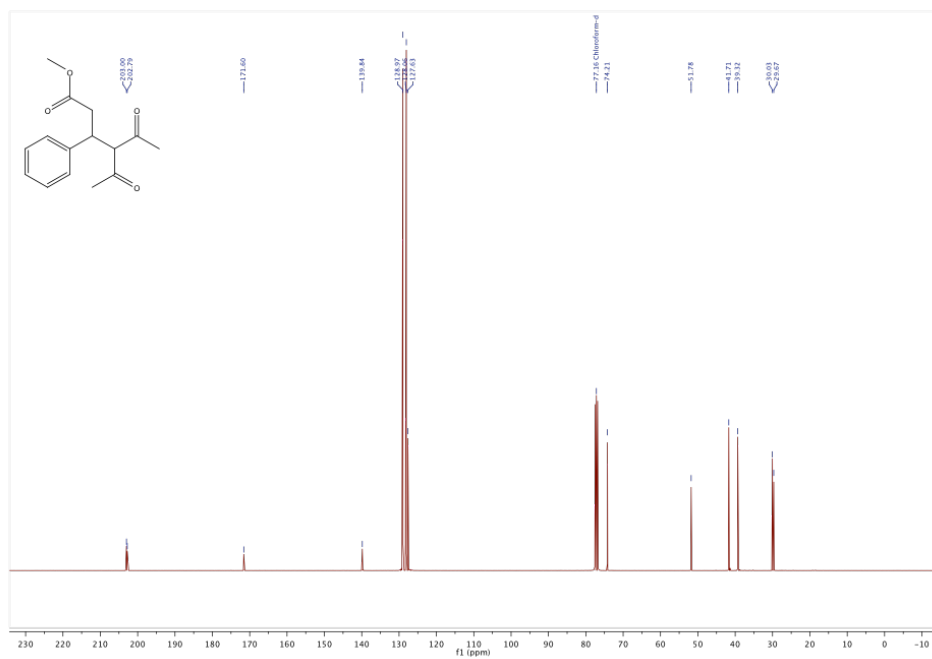

## HLPC data

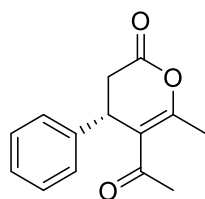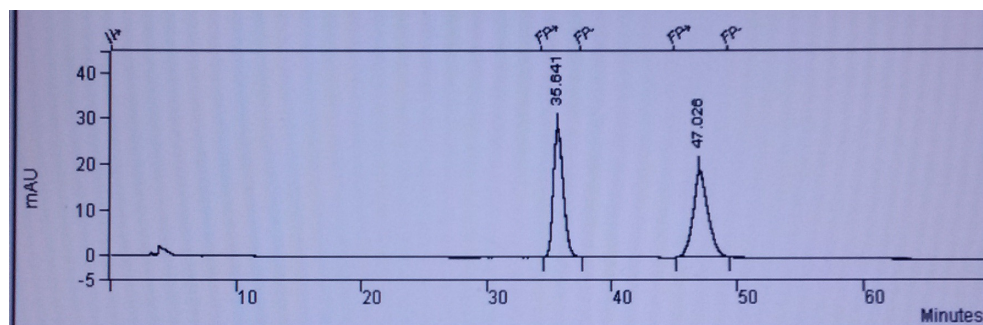

Results

\*\* Star Chromatography Workstation (Demo) Version 5.31 \*\* 05000-1B68-F63-3AA9 \*\*

Run Mode : Analysis  
 Peak Measurement: Peak Area  
 Calculation Type: Percent

| Peak No. | Peak Name | Result (%) | Ret. Time (min) | Time Offset (min) | Area (counts) | Sep. Code | Width 1/2 (sec) | Status Codes |
|----------|-----------|------------|-----------------|-------------------|---------------|-----------|-----------------|--------------|
| 1        |           | 50.2442    | 35.641          | 0.000             | 832998        | BB        | 52.0            |              |
| 2        |           | 49.7558    | 47.026          | 0.000             | 824899        | BB        | 72.7            |              |
| Totals:  |           | 100.0000   |                 | 0.000             | 1657897       |           |                 |              |

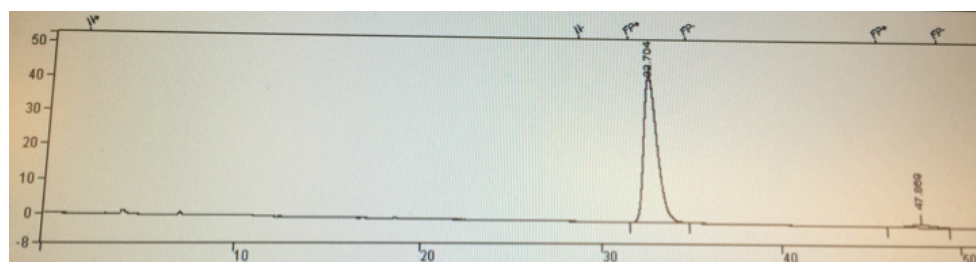

| Peak No. | Peak Name | Result (%) | Ret. Time (min) | Time Offset (min) | Area (counts) | Sep. Code | Width 1/2 (sec) | Status Codes |
|----------|-----------|------------|-----------------|-------------------|---------------|-----------|-----------------|--------------|
| 1        |           | 96.7539    | 32.704          | 0.000             | 1216452       | BB        | 48.1            |              |
| 2        |           | 3.2461     | 47.869          | 0.000             | 40812         | BB        | 96.3            |              |
| Totals:  |           | 100.0000   |                 | 0.000             | 1257264       |           |                 |              |

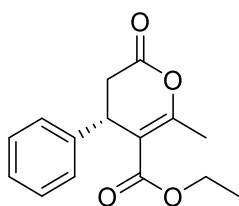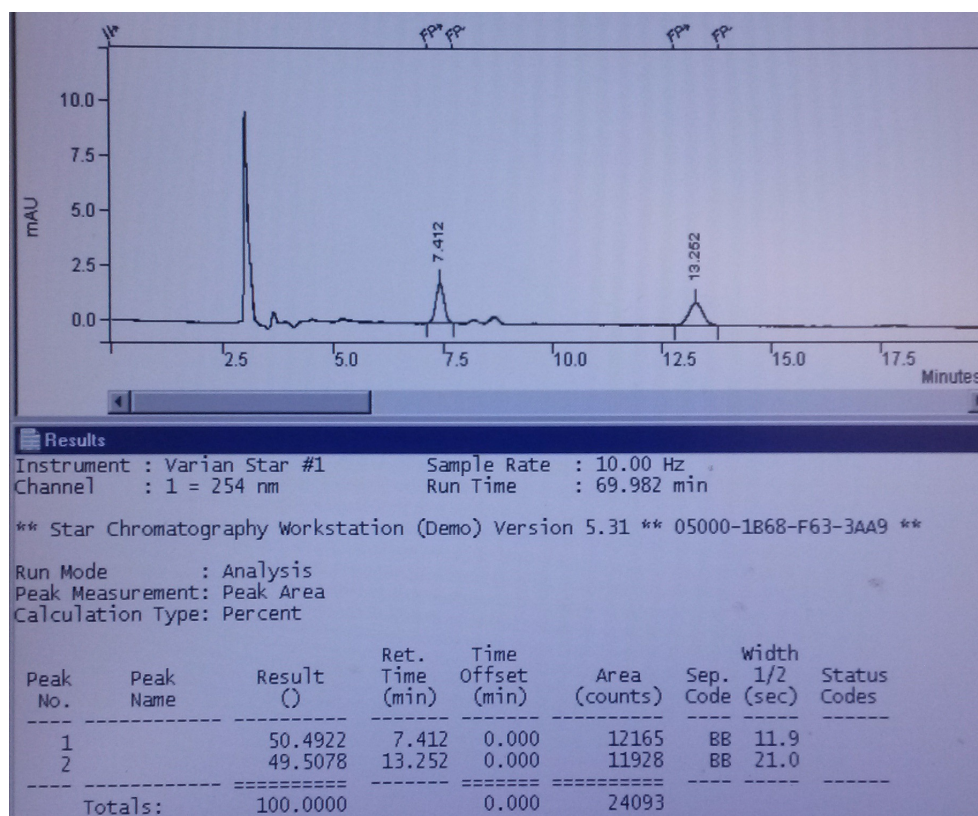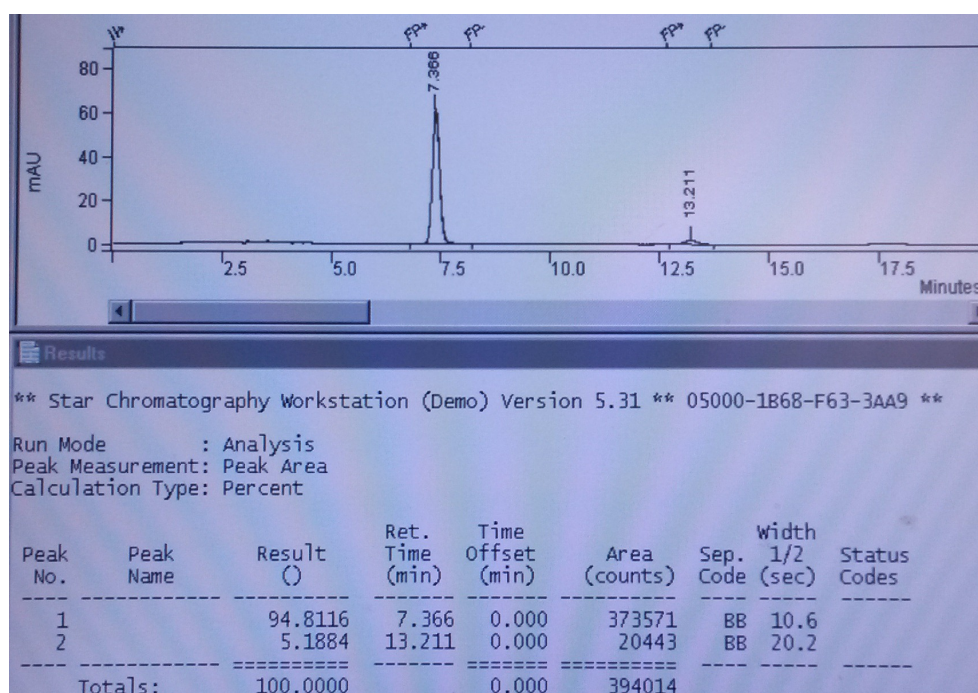



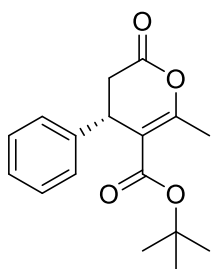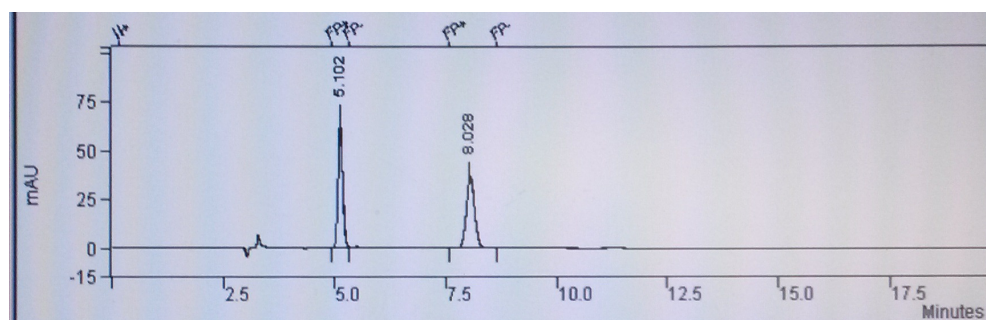

Results

\*\* Star Chromatography Workstation (Demo) Version 5.31 \*\* 05000-1B68-F63-3AA9 \*\*

Run Mode : Analysis  
 Peak Measurement: Peak Area  
 Calculation Type: Percent

| Peak No. | Peak Name | Result<br>(%) | Ret. Time<br>(min) | Time Offset<br>(min) | Area<br>(counts) | Sep. Code | Width 1/2<br>(sec) | Status Codes |
|----------|-----------|---------------|--------------------|----------------------|------------------|-----------|--------------------|--------------|
| 1        |           | 49.7691       | 5.102              | 0.000                | 243691           | BB        | 6.5                |              |
| 2        |           | 50.2309       | 8.028              | 0.000                | 245952           | BB        | 11.9               |              |
| Totals:  |           | 100.0000      |                    | 0.000                | 489643           |           |                    |              |

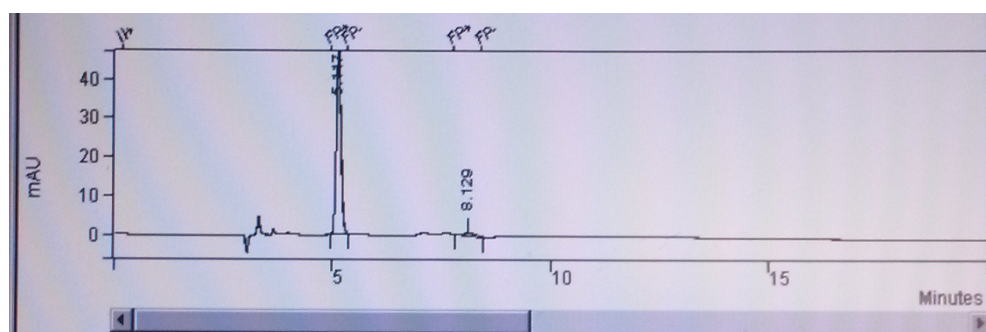

Results

\*\* Star Chromatography Workstation (Demo) Version 5.31 \*\* 05000-1B68-F63-3AA9 \*\*

Run Mode : Analysis  
 Peak Measurement: Peak Area  
 Calculation Type: Percent

| Peak No. | Peak Name | Result<br>(%) | Ret. Time<br>(min) | Time Offset<br>(min) | Area<br>(counts) | Sep. Code | Width 1/2<br>(sec) | Status Codes |
|----------|-----------|---------------|--------------------|----------------------|------------------|-----------|--------------------|--------------|
| 1        |           | 96.0717       | 5.117              | 0.000                | 190300           | BB        | 6.5                |              |
| 2        |           | 3.9283        | 8.129              | 0.000                | 7781             | BB        | 10.8               |              |
| Totals:  |           | 100.0000      |                    | 0.000                | 198081           |           |                    |              |

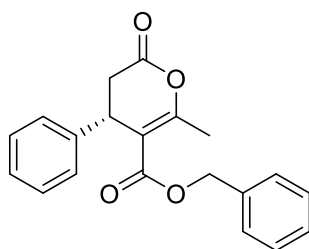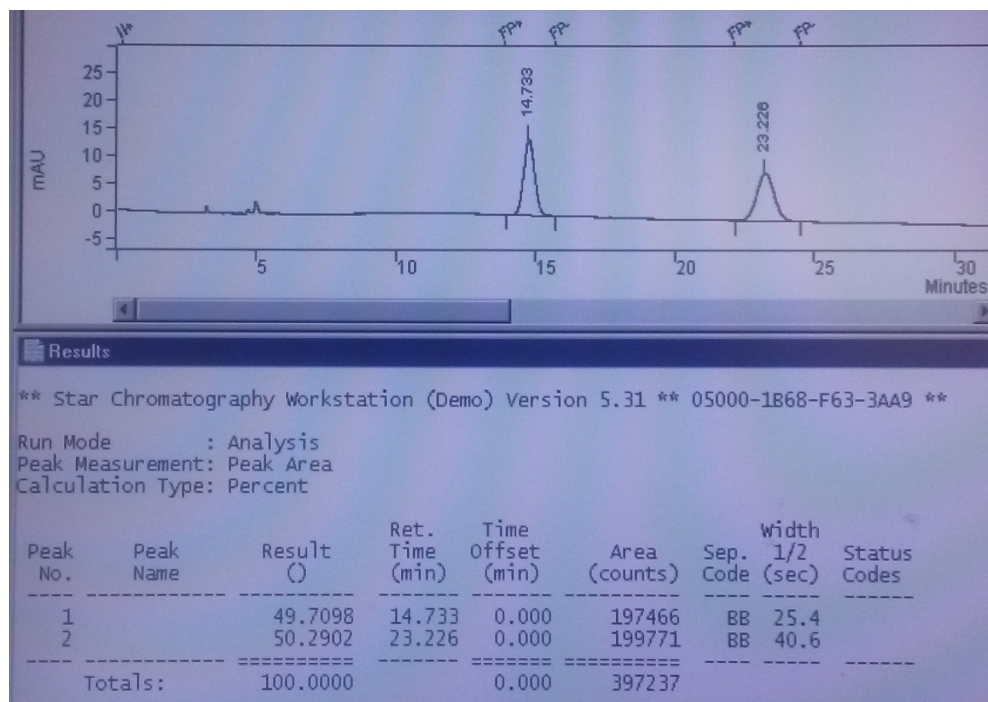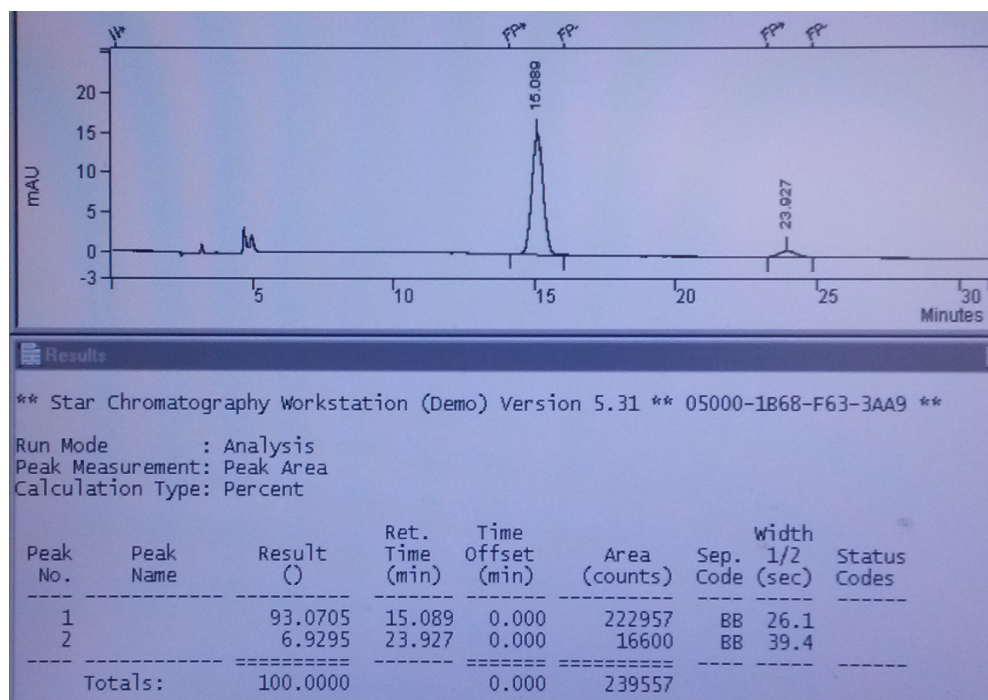



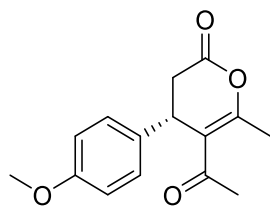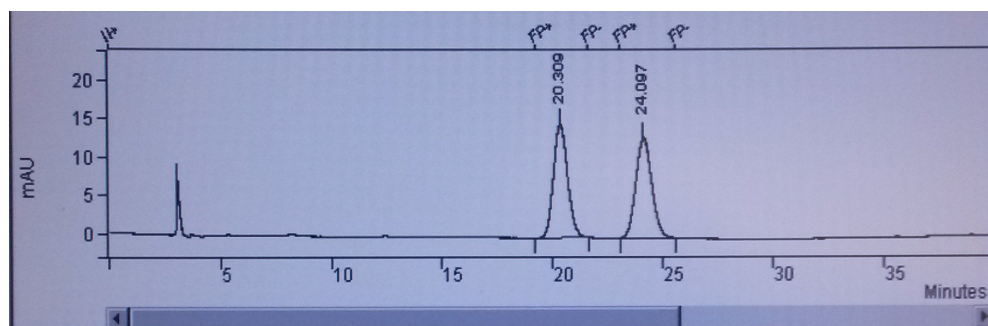

Results

\*\* Star Chromatography Workstation (Demo) Version 5.31 \*\* 05000-1B68-F63-3AA9 \*\*

Run Mode : Analysis  
 Peak Measurement: Peak Area  
 Calculation Type: Percent

| Peak No. | Peak Name | Result ( ) | Ret. Time (min) | Time Offset (min) | Area (counts) | Sep. Code | width 1/2 (sec) | Status Codes |
|----------|-----------|------------|-----------------|-------------------|---------------|-----------|-----------------|--------------|
| 1        |           | 50.0289    | 20.309          | 0.000             | 349581        | BB        | 41.2            |              |
| 2        |           | 49.9711    | 24.097          | 0.000             | 349178        | BB        | 47.0            |              |
| Totals:  |           | 100.0000   |                 | 0.000             | 698759        |           |                 |              |

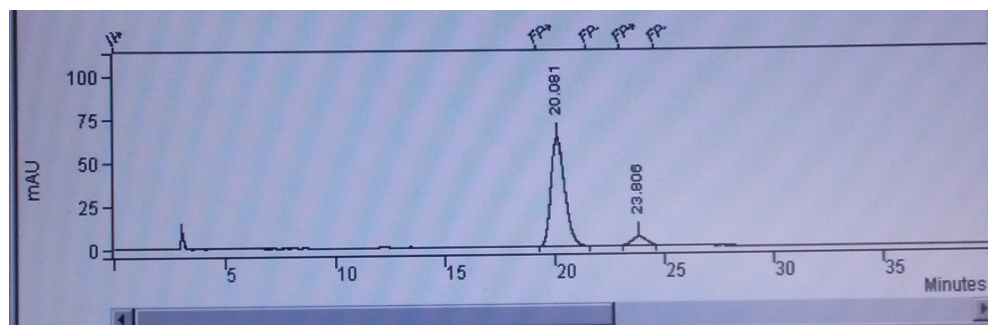

Results

\*\* Star Chromatography Workstation (Demo) Version 5.31 \*\* 05000-1B68-F63-3AA9 \*\*

Run Mode : Analysis  
 Peak Measurement: Peak Area  
 Calculation Type: Percent

| Peak No. | Peak Name | Result ( ) | Ret. Time (min) | Time Offset (min) | Area (counts) | Sep. Code | width 1/2 (sec) | Status Codes |
|----------|-----------|------------|-----------------|-------------------|---------------|-----------|-----------------|--------------|
| 1        |           | 92.2718    | 20.081          | 0.000             | 1452679       | BB        | 40.3            |              |
| 2        |           | 7.7282     | 23.806          | 0.000             | 121668        | BB        | 43.5            |              |
| Totals:  |           | 100.0000   |                 | 0.000             | 1574347       |           |                 |              |



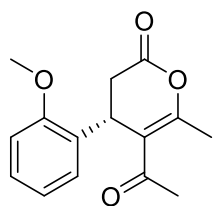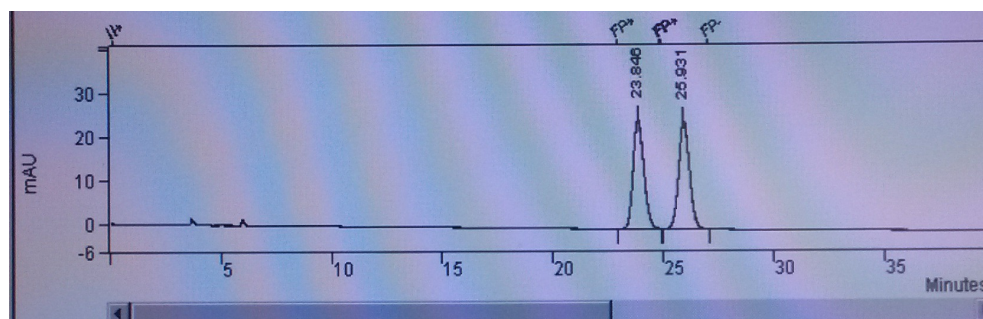

Results

\*\* Star Chromatography Workstation (Demo) Version 5.31 \*\* 05000-1B68-F63-3AA9 \*\*

Run Mode : Analysis  
 Peak Measurement: Peak Area  
 Calculation Type: Percent

| Peak No. | Peak Name | Result ( ) | Ret. Time (min) | Time Offset (min) | Area (counts) | Sep. Code | width 1/2 (sec) | Status Codes |
|----------|-----------|------------|-----------------|-------------------|---------------|-----------|-----------------|--------------|
| 1        |           | 50.0466    | 23.846          | 0.000             | 445850        | BB        | 31.6            |              |
| 2        |           | 49.9534    | 25.931          | 0.000             | 445020        | BB        | 31.5            |              |
| Totals:  |           | 100.0000   |                 | 0.000             | 890870        |           |                 |              |

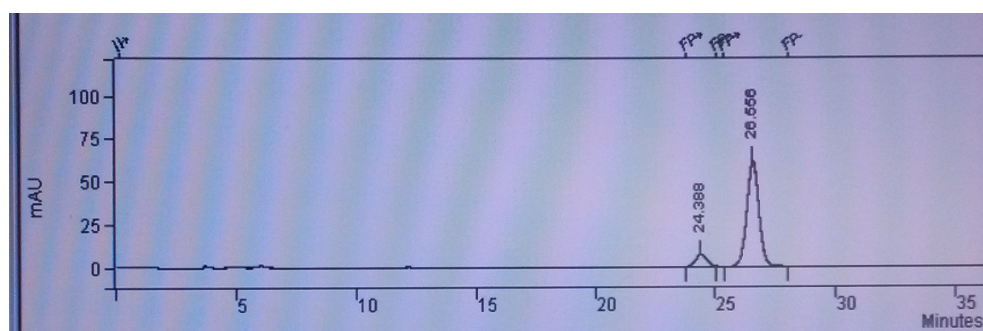

Results

\*\* Star Chromatography Workstation (Demo) Version 5.31 \*\* 05000-1B68-F63-3AA9 \*\*

Run Mode : Analysis  
 Peak Measurement: Peak Area  
 Calculation Type: Percent

| Peak No. | Peak Name | Result ( ) | Ret. Time (min) | Time Offset (min) | Area (counts) | Sep. Code | width 1/2 (sec) | Status Codes |
|----------|-----------|------------|-----------------|-------------------|---------------|-----------|-----------------|--------------|
| 1        |           | 9.4321     | 24.388          | 0.000             | 118630        | BB        | 31.1            |              |
| 2        |           | 90.5679    | 26.556          | 0.000             | 1139106       | BB        | 32.0            |              |
| Totals:  |           | 100.0000   |                 | 0.000             | 1257736       |           |                 |              |

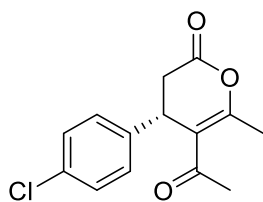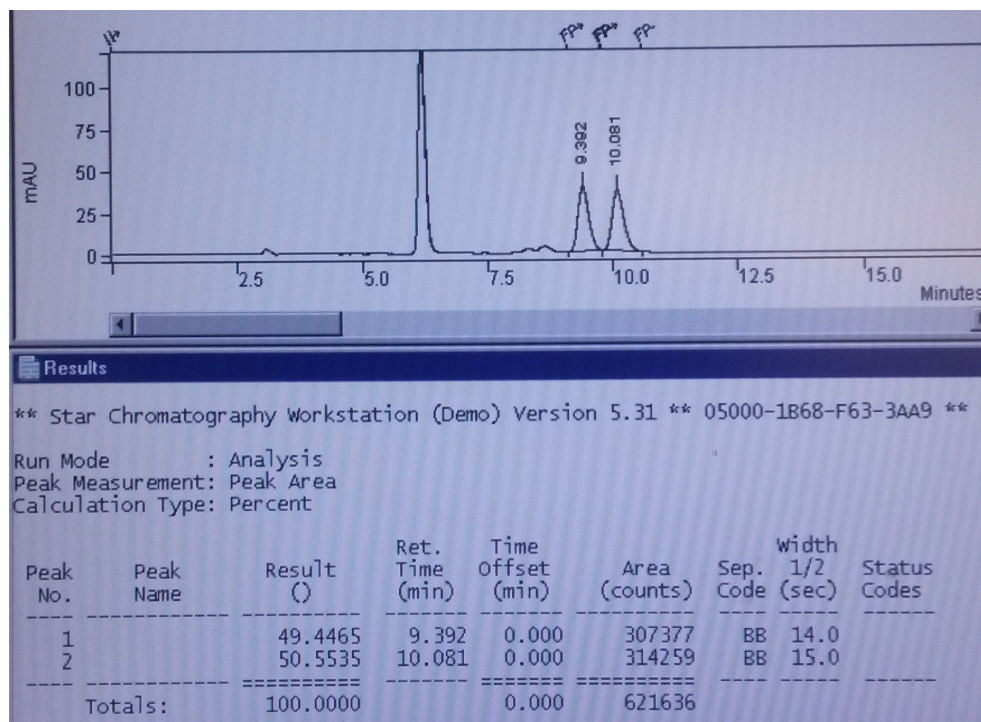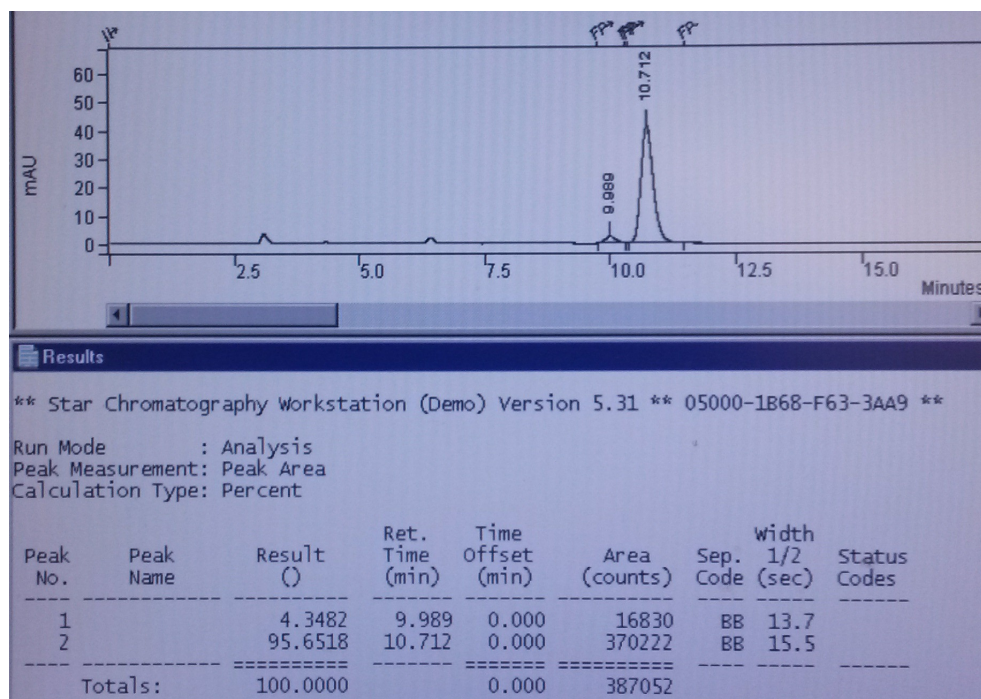



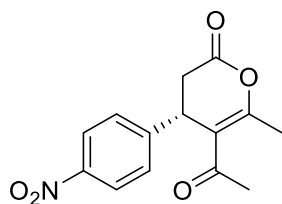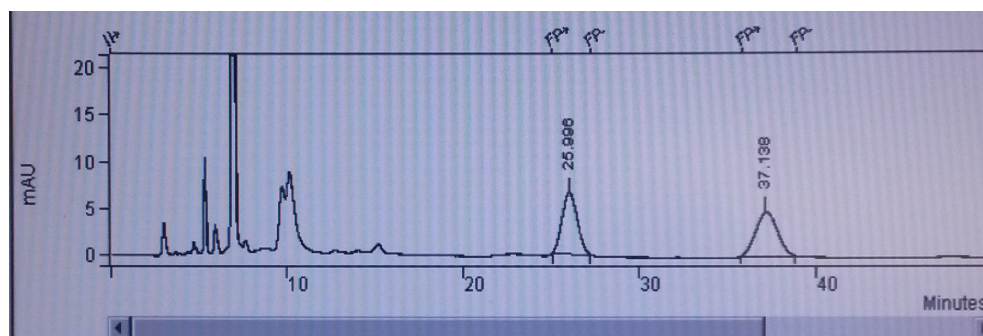

Results

\*\* Star Chromatography Workstation (Demo) Version 5.31 \*\* 05000-1B68-F63-3AA9 \*\*

Run Mode : Analysis  
Peak Measurement: Peak Area  
Calculation Type: Percent

| Peak No. | Peak Name | Result ( ) | Ret. Time (min) | Time Offset (min) | Area (counts) | Sep. Code | width 1/2 (sec) | Status Codes |
|----------|-----------|------------|-----------------|-------------------|---------------|-----------|-----------------|--------------|
| 1        |           | 49.5043    | 25.996          | 0.000             | 204801        | BB        | 56.2            |              |
| 2        |           | 50.4957    | 37.138          | 0.000             | 208902        | BB        | 80.5            |              |
| Totals:  |           | 100.0000   |                 | 0.000             | 413703        |           |                 |              |

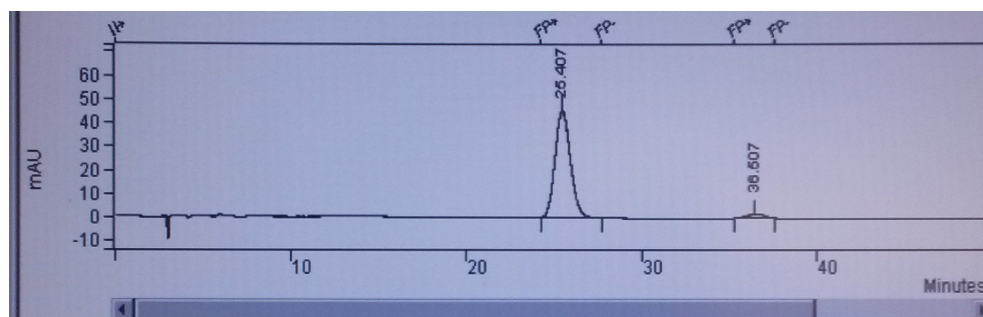

Results

\*\* Star Chromatography Workstation (Demo) Version 5.31 \*\* 05000-1B68-F63-3AA9 \*\*

Run Mode : Analysis  
Peak Measurement: Peak Area  
Calculation Type: Percent

| Peak No. | Peak Name | Result ( ) | Ret. Time (min) | Time Offset (min) | Area (counts) | Sep. Code | width 1/2 (sec) | Status Codes |
|----------|-----------|------------|-----------------|-------------------|---------------|-----------|-----------------|--------------|
| 1        |           | 95.7859    | 25.407          | 0.000             | 1469312       | BB        | 56.6            |              |
| 2        |           | 4.2141     | 36.507          | 0.000             | 64643         | BB        | 71.8            |              |
| Totals:  |           | 100.0000   |                 | 0.000             | 1533955       |           |                 |              |

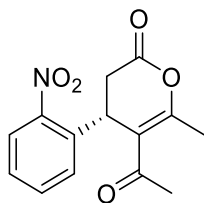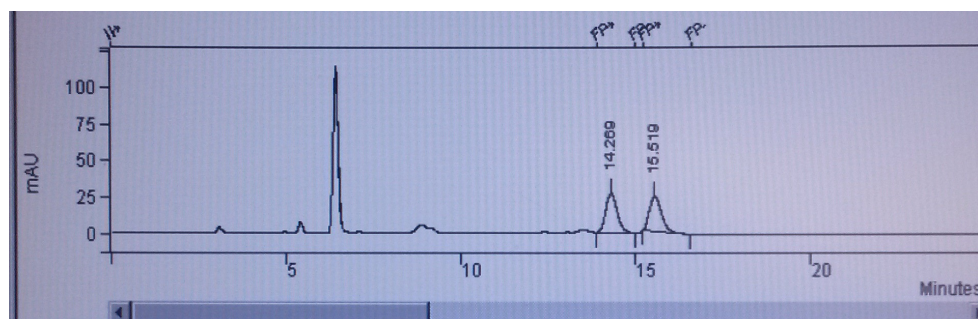

Results

\*\* Star Chromatography Workstation (Demo) Version 5.31 \*\* 05000-1B68-F63-3AA9 \*\*

Run Mode : Analysis  
Peak Measurement: Peak Area  
Calculation Type: Percent

| Peak No. | Peak Name | Result (°) | Ret. Time (min) | Time Offset (min) | Area (counts) | Sep. Code | Width 1/2 (sec) | Status Codes |
|----------|-----------|------------|-----------------|-------------------|---------------|-----------|-----------------|--------------|
| 1        |           | 52.8842    | 14.269          | 0.000             | 324486        | BB        | 21.1            |              |
| 2        |           | 47.1158    | 15.519          | 0.000             | 289093        | BB        | 21.9            |              |
| Totals:  |           | 100.0000   |                 | 0.000             | 613579        |           |                 |              |

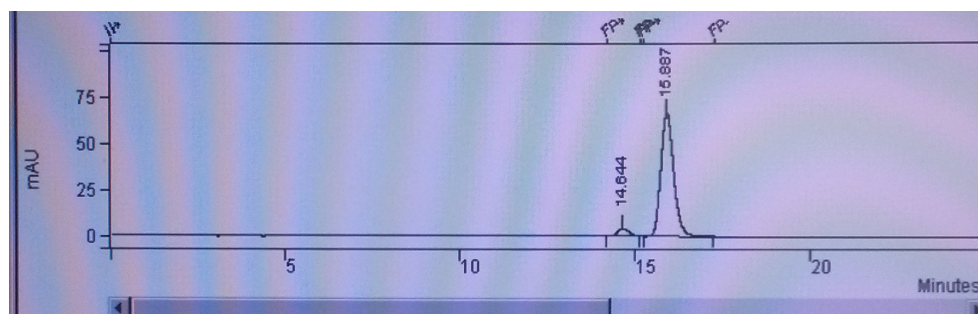

Results

\*\* Star Chromatography Workstation (Demo) Version 5.31 \*\* 05000-1B68-F63-3AA9 \*\*

Run Mode : Analysis  
Peak Measurement: Peak Area  
Calculation Type: Percent

| Peak No. | Peak Name | Result (°) | Ret. Time (min) | Time Offset (min) | Area (counts) | Sep. Code | Width 1/2 (sec) | Status Codes |
|----------|-----------|------------|-----------------|-------------------|---------------|-----------|-----------------|--------------|
| 1        |           | 4.8638     | 14.644          | 0.000             | 45827         | BB        | 20.2            |              |
| 2        |           | 95.1362    | 15.887          | 0.000             | 896365        | BB        | 23.2            |              |
| Totals:  |           | 100.0000   |                 | 0.000             | 942192        |           |                 |              |



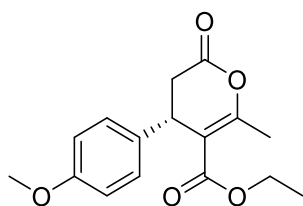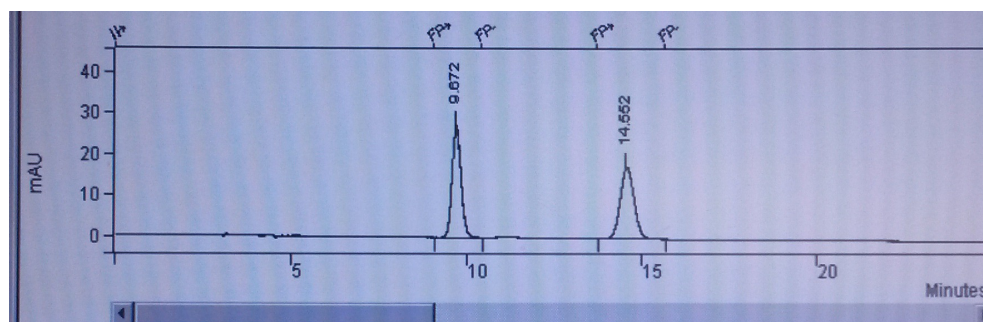

Results

\*\* Star Chromatography Workstation (Demo) Version 5.31 \*\* 05000-1B68-F63-3AA9 \*\*

Run Mode : Analysis  
 Peak Measurement: Peak Area  
 Calculation Type: Percent

| Peak No. | Peak Name | Result ( ) | Ret. Time (min) | Time Offset (min) | Area (counts) | Sep. Code | Width 1/2 (sec) | Status Codes |
|----------|-----------|------------|-----------------|-------------------|---------------|-----------|-----------------|--------------|
| 1        |           | 49.9532    | 9.672           | 0.000             | 253909        | BB        | 16.3            |              |
| 2        |           | 50.0468    | 14.552          | 0.000             | 254384        | BB        | 25.4            |              |
| Totals:  |           | 100.0000   |                 | 0.000             | 508293        |           |                 |              |

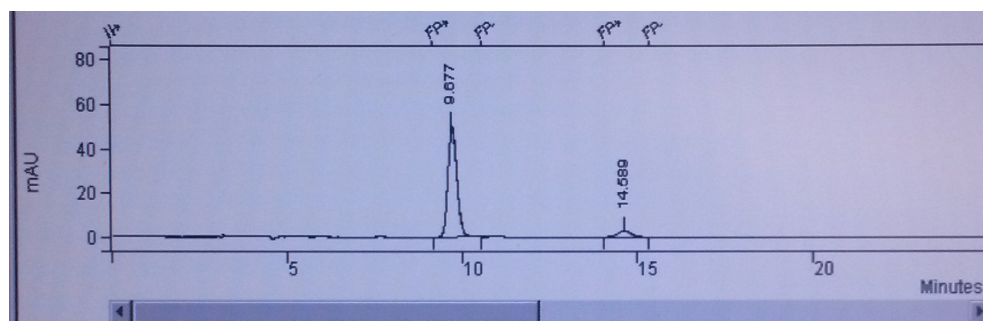

Results

\*\* Star Chromatography Workstation (Demo) Version 5.31 \*\* 05000-1B68-F63-3AA9 \*\*

Run Mode : Analysis  
 Peak Measurement: Peak Area  
 Calculation Type: Percent

| Peak No. | Peak Name | Result ( ) | Ret. Time (min) | Time Offset (min) | Area (counts) | Sep. Code | Width 1/2 (sec) | Status Codes |
|----------|-----------|------------|-----------------|-------------------|---------------|-----------|-----------------|--------------|
| 1        |           | 92.5552    | 9.677           | 0.000             | 469359        | BB        | 16.4            |              |
| 2        |           | 7.4448     | 14.589          | 0.000             | 37753         | BB        | 25.5            |              |
| Totals:  |           | 100.0000   |                 | 0.000             | 507112        |           |                 |              |

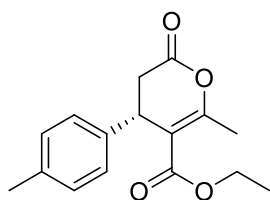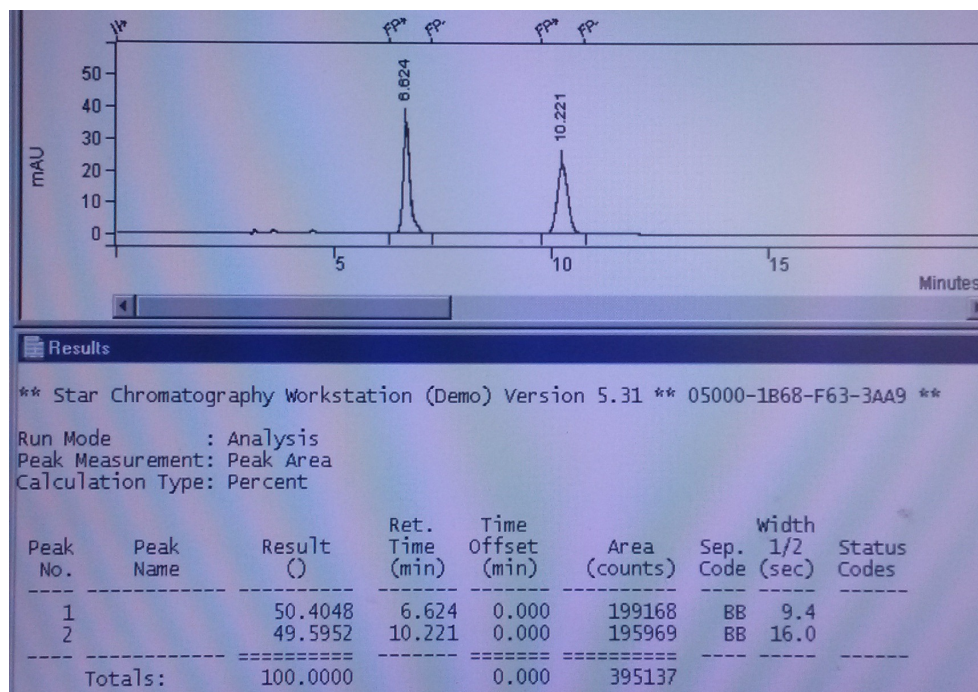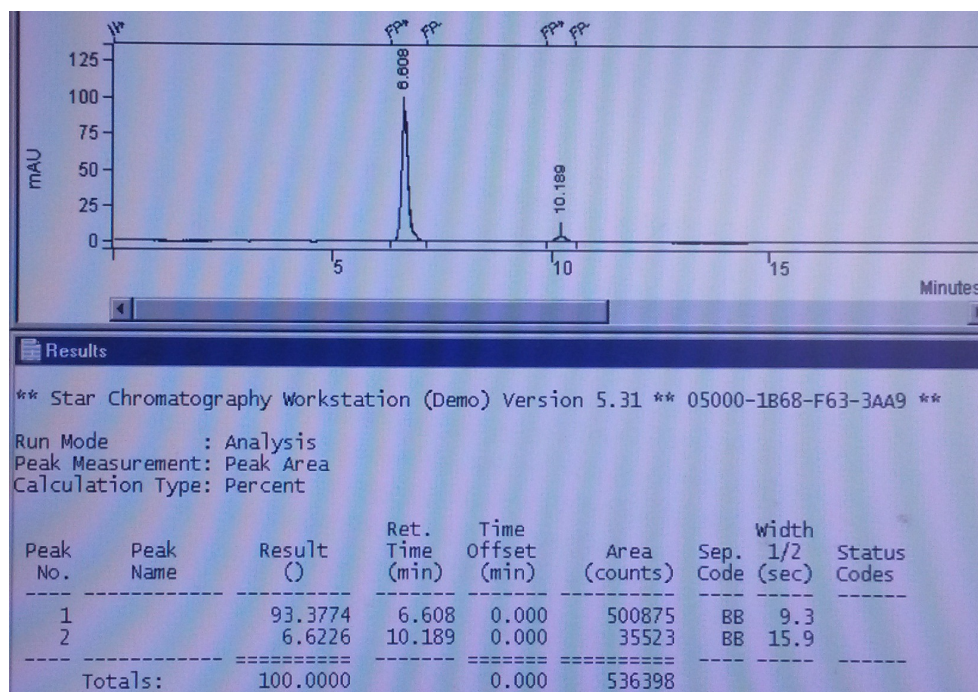



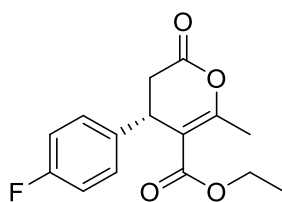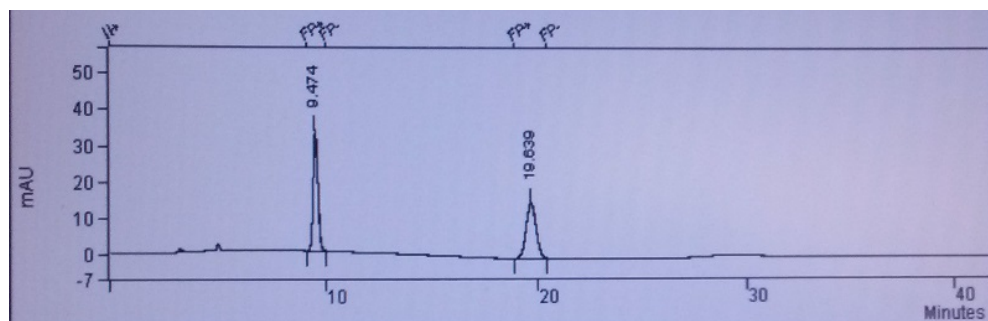

Results

\*\* Star Chromatography Workstation (Demo) Version 5.31 \*\* 05000-1B68-F63-3AA9 \*\*

Run Mode : Analysis  
 Peak Measurement: Peak Area  
 Calculation Type: Percent

| Peak No. | Peak Name | Result ( ) | Ret. Time (min) | Time Offset (min) | Area (counts) | Sep. Code | Width 1/2 (sec) | Status Codes |
|----------|-----------|------------|-----------------|-------------------|---------------|-----------|-----------------|--------------|
| 1        |           | 50.3423    | 9.474           | 0.000             | 268123        | BB        | 14.0            |              |
| 2        |           | 49.6577    | 19.639          | 0.000             | 264477        | BB        | 30.7            |              |
| Totals:  |           | 100.0000   |                 | 0.000             | 532600        |           |                 |              |

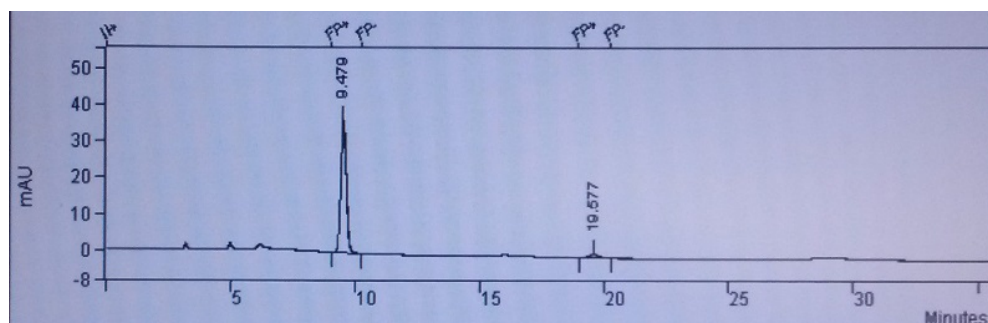

Results

\*\* Star Chromatography Workstation (Demo) Version 5.31 \*\* 05000-1B68-F63-3AA9 \*\*

Run Mode : Analysis  
 Peak Measurement: Peak Area  
 Calculation Type: Percent

| Peak No. | Peak Name | Result ( ) | Ret. Time (min) | Time Offset (min) | Area (counts) | Sep. Code | Width 1/2 (sec) | Status Codes |
|----------|-----------|------------|-----------------|-------------------|---------------|-----------|-----------------|--------------|
| 1        |           | 94.9257    | 9.479           | 0.000             | 290289        | BB        | 14.0            |              |
| 2        |           | 5.0743     | 19.577          | 0.000             | 15518         | BB        | 29.5            |              |
| Totals:  |           | 100.0000   |                 | 0.000             | 305807        |           |                 |              |

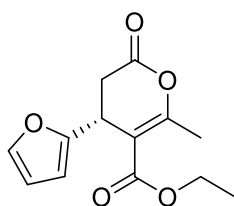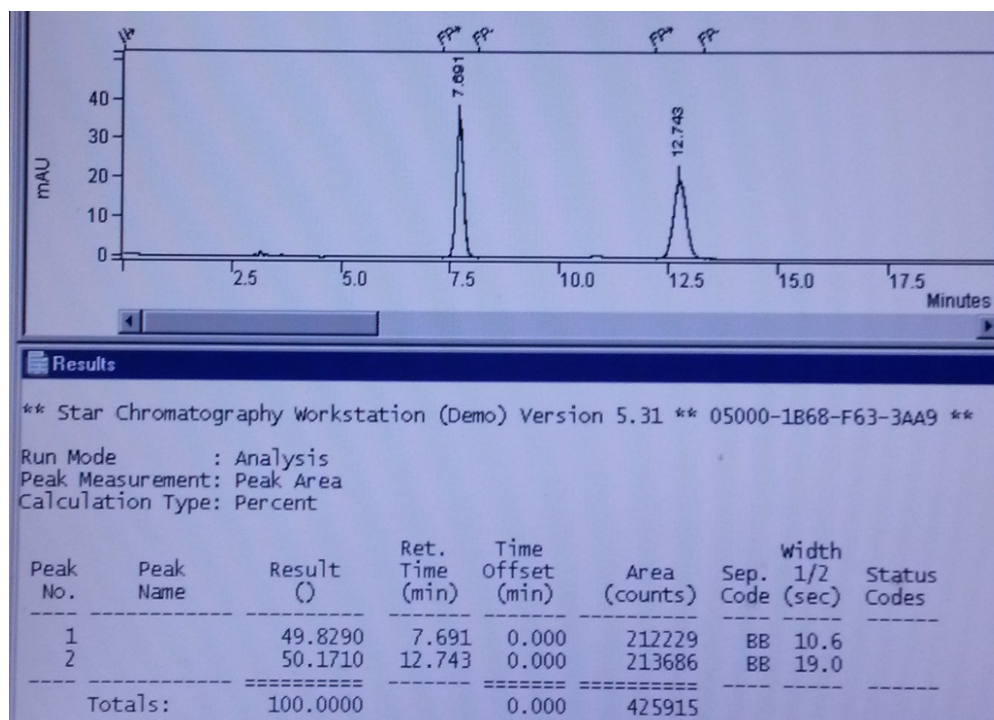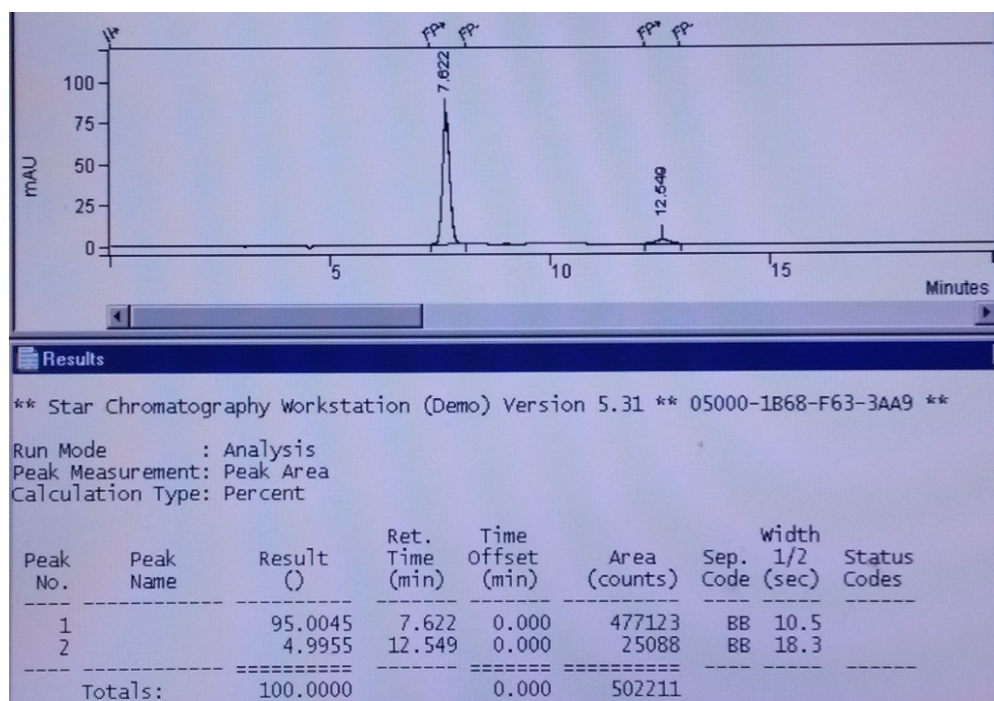



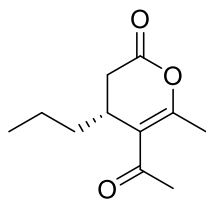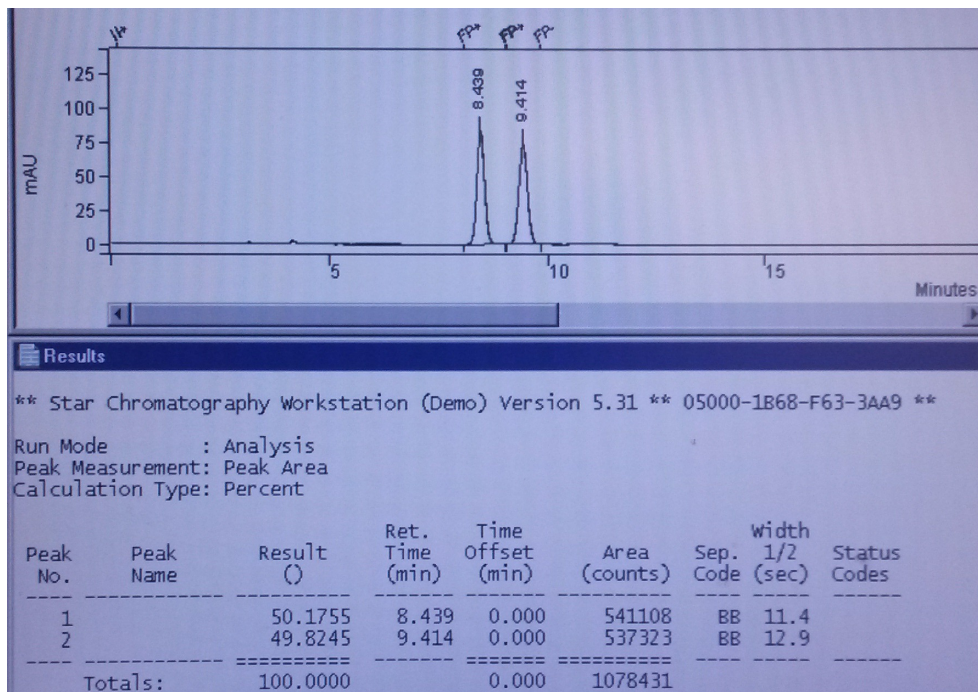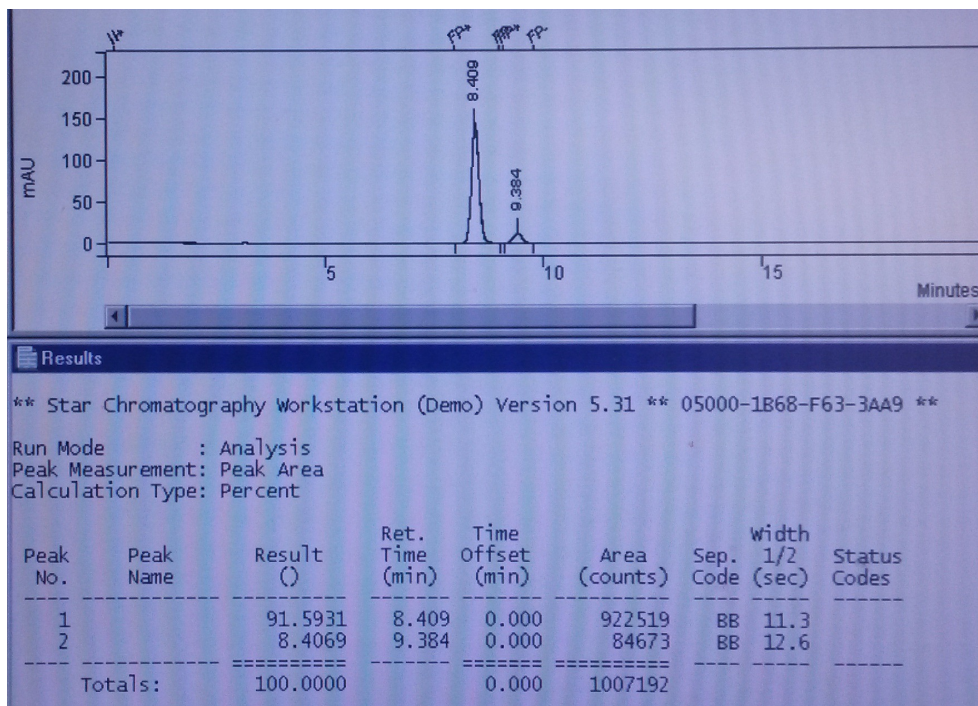

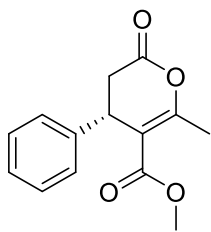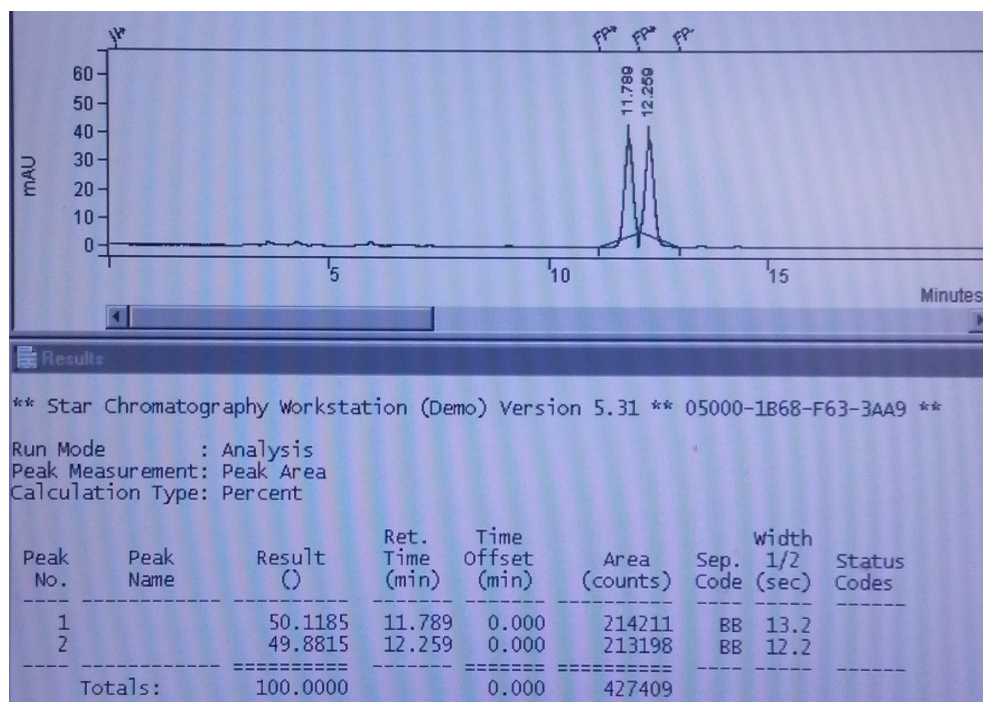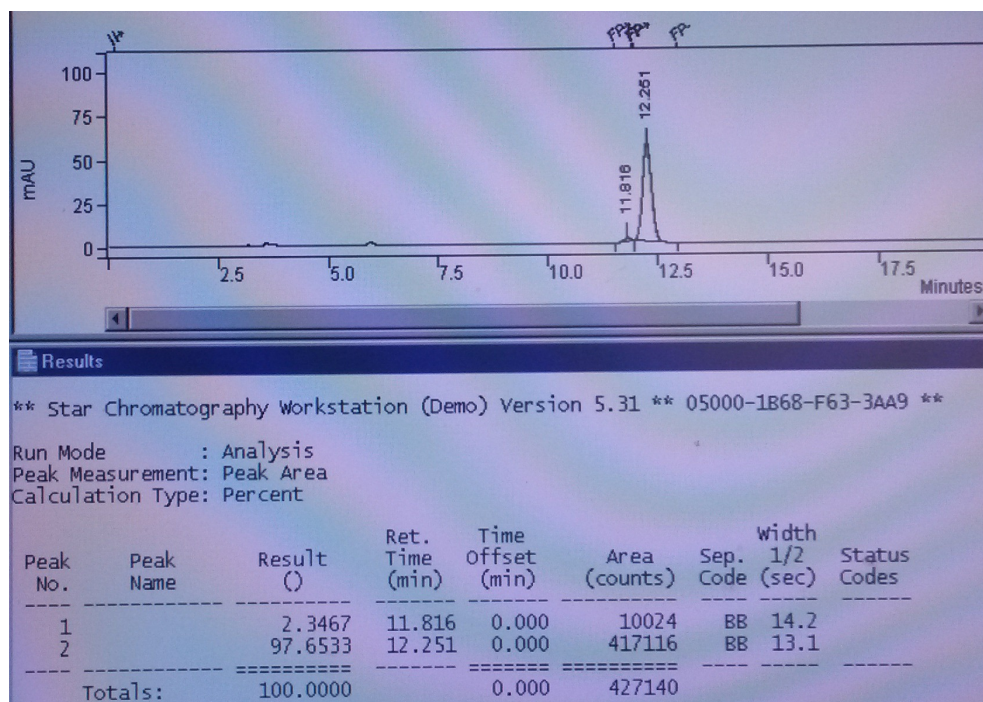



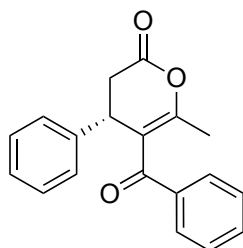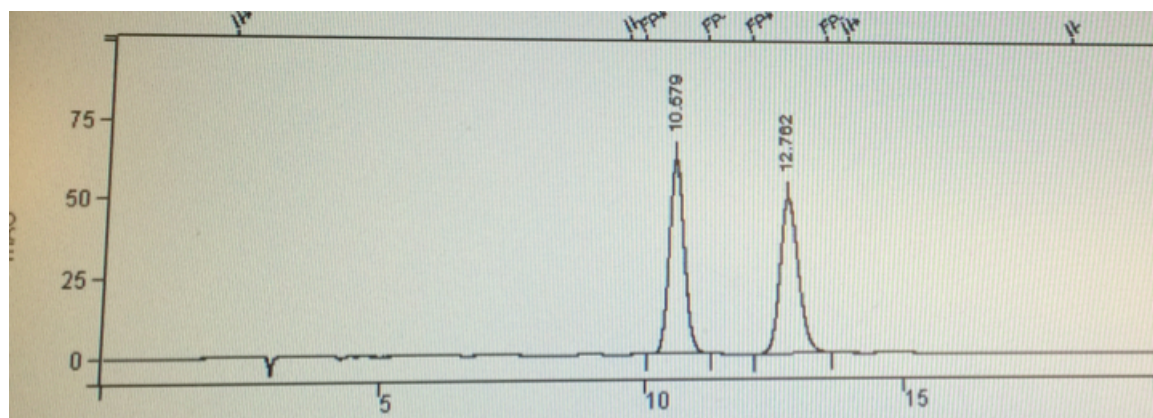

| Peak No. | Peak Name | Result (°) | Ret. Time (min) | Time Offset (min) | Area (counts) | Sep. Code | width 1/2 (sec) | Status Codes |
|----------|-----------|------------|-----------------|-------------------|---------------|-----------|-----------------|--------------|
| 1        |           | 50.0725    | 10.579          | 0.000             | 651683        | BB        | 18.5            |              |
| 2        |           | 49.9275    | 12.762          | 0.000             | 649796        | BB        | 23.0            |              |
| Totals:  |           | 100.0000   |                 | 0.000             | 1301479       |           |                 |              |

Total Unidentified Counts : 1301479 counts

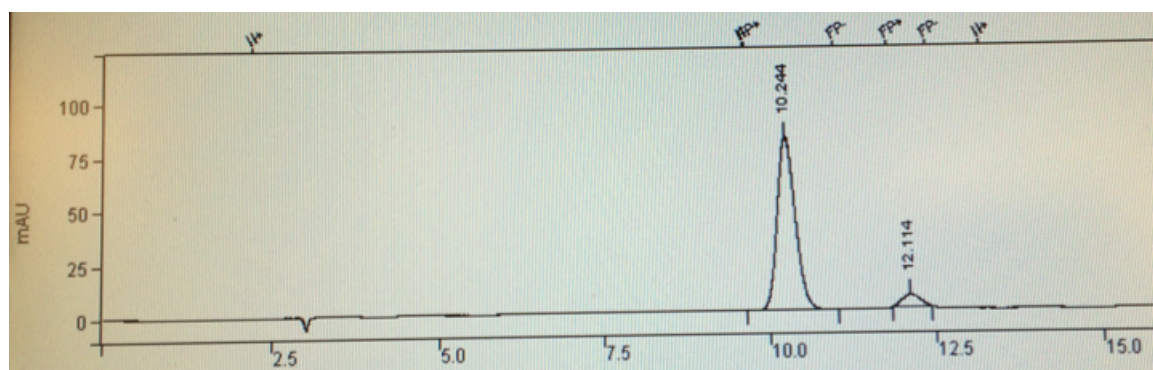

| Peak No. | Peak Name | Result (°) | Ret. Time (min) | Time Offset (min) | Area (counts) | Sep. Code | width 1/2 (sec) | Status Codes |
|----------|-----------|------------|-----------------|-------------------|---------------|-----------|-----------------|--------------|
| 1        |           | 93.6274    | 10.244          | 0.000             | 811198        | BB        | 17.6            |              |
| 2        |           | 6.3726     | 12.114          | 0.000             | 55213         | BB        | 18.7            |              |
| Totals:  |           | 100.0000   |                 | 0.000             | 866411        |           |                 |              |

Total Unidentified Counts : 866411 counts

Detected Peaks: 2      Rejected Peaks: 0      Identified Peaks: 0

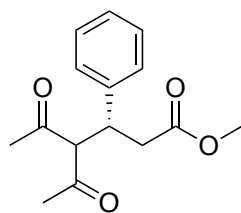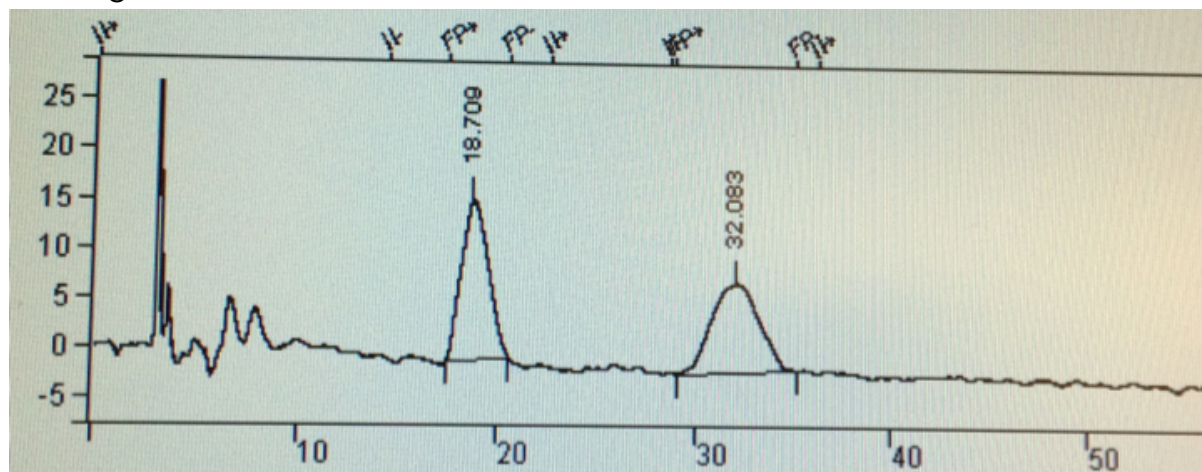

| Peak No. | Peak Name | Result () | Ret. Time (min) | Time Offset (min) | Area (counts) | Sep. Code | width 1/2 (sec) | Status Codes |
|----------|-----------|-----------|-----------------|-------------------|---------------|-----------|-----------------|--------------|
| 1        |           | 50.0775   | 18.709          | 0.000             | 803856        | BB        | 94.4            |              |
| 2        |           | 49.9225   | 32.083          | 0.000             | 801367        | BB        | 166.0           |              |
| Totals:  |           | 100.0000  |                 | 0.000             | 1605223       |           |                 |              |

Total Unidentified Counts : 1605224 counts

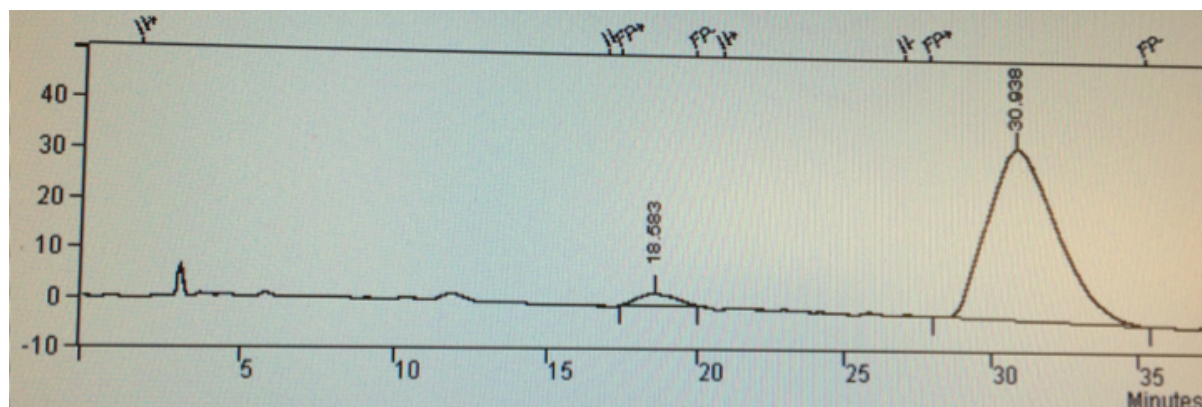

| Peak No. | Peak Name | Result () | Ret. Time (min) | Time Offset (min) | Area (counts) | Sep. Code | width 1/2 (sec) | Status Codes |
|----------|-----------|-----------|-----------------|-------------------|---------------|-----------|-----------------|--------------|
| 1        |           | 3.4258    | 18.583          | 0.000             | 109622        | BB        | 90.2            |              |
| 2        |           | 96.5742   | 30.938          | 0.000             | 3090274       | BB        | 154.6           |              |
| Totals:  |           | 100.0000  |                 | 0.000             | 3199896       |           |                 |              |

## References

- (1) S. De Sarkar and A. Studer, *Angew. Chem. Int. Ed.*, 2010, **49**, 9266-9269.
- (2) F.-G. Sun, L.-H. Sun and S. Ye, *Adv. Synth. Catal.*, 2011, **353**, 3134-3138
- (3) D. Xie, D. Shen, Q. Chen, J. Zhou, X. Zeng and G. Zhong, *J. Org. Chem.*, **2016**, *81* (14), 6136–6141
- (4) Z.-Q. Zhu, J.-C. Xiao, *Adv. Synth. Catal.*, 2010, **352**, 2455–2458
- (5) E. R. T. Robinson, C. Fallan, C. Simal, A. M. Z. Slawin, A. D. Smith, *Chem. Sci.*, 2013, **4**, 2193
